# Supplementary material
Source: MDPI journal article supplement (https://www.mdpi.com/2571-6255/6/7/276)
Supplement: s1 [file s1]

Archive with 5 entries (5 files):
- Supplement S1 Modeling System.pdf
- Supplement S2 Vegetation and Land Cover.pdf
- Supplement S3 Fire Manager Survey.pdf
- Supplement S4 Supp_Figs_Tables.pdf
- Supplement S5 READMES for Repository.pdf
