# Supplementary material
Source: MDPI journal article supplement (https://www.mdpi.com/2571-6255/6/7/276)
Supplement: s1 [file s1 › Supplement S2 Vegetation and Land Cover.pdf]

## **Supplement S2. Vegetation and Land Cover Classification System and Background Materials to Link State Transitions to Douglas-Fir Site Index and MC1 Climate Drivers**

*For easiest navigation, open the bookmarks tab to locate a desired section and then return to the TOC or go to any other section.*

### **Table of Contents**

|                                                                                        |           |
|----------------------------------------------------------------------------------------|-----------|
| <i>1. SWCNH State-and-Transition Model Community Types .....</i>                       | <i>1</i>  |
| <i>2. List of Land Use/Land Cover and Vegetation Types.....</i>                        | <i>3</i>  |
| <i>3. Plot Selection for Calculation of State-and-Transition Probabilities .....</i>   | <i>7</i>  |
| <i>4. Tree Regeneration for Vegetation States.....</i>                                 | <i>16</i> |
| <i>5. Calculation of Current and Future Site Index for the Willamette Valley .....</i> | <i>21</i> |
| <i>6. Notes on Estimation of Future Site Index for Douglas-Fir .....</i>               | <i>32</i> |

Each section of this supplement is comprised of a previously unpublished report generated by different members of the research team during the course of this project.

Section 1 is reprinted in modified form from:

Gabriel I. Yospin, Scott D. Bridgham, Ronald P. Neilson, John P. Bolte, Dominique M. Bachelet, Peter J. Gould, Constance A. Harrington, Jane A. Kertis, Cody Evers, Bart R. Johnson. 2015. A new model to simulate climate-change impacts on forest succession for local land management. *Ecological Applications* 25:226–242. <http://dx.doi.org/10.1890/13-0906.1>.

Section 2 is authored by Bart Johnson.

Sections 3-6 are authored by Peter Gould and Connie Harrington.

## 1. SWCNH State-and-Transition Model Community Types

*The full successional plus managed states vegetation system was built based on Yospin et al. 2015.*

**Cover Type Classification.** We reduced diverse species and species assemblages to eleven successional cover types. In general, we grouped species that were phylogenetically or ecologically related. Each group has local and regional archetypes. The first is a group of xeric, broadleaf deciduous trees. Deciduous oaks (*Quercus* spp.) are the archetype, with Oregon white oak (*Quercus garryana*) and California black oak (*Quercus kelloggii*) the current local dominants. The group also includes chinquapin (*Chrysolepis* spp.). We grouped mesic broadleaf deciduous trees that are frequently found in riparian forest or on mesic slopes. In the Willamette Valley, the archetype for this group is Oregon big leaf maple (*Acer macrophyllum*), but it also includes many other genera (*Alnus*, *Cornus*, *Fraxinus*, *Malus*, *Populus*, *Prunus*, *Salix*). Our archetype for less mesic needleleaf evergreen species was Douglas-fir (*Pseudotsuga menziesii*). The archetype for more mesic needleleaf evergreen species was grand fir (*Abies grandis*), but this group also includes the genera *Thuja* and *Tsuga*. Finally, there are two community types that are not abundant in the Willamette Valley now, but could be in the future with climate change: an evergreen oak community, represented by Pacific madrone (*Arbutus menziesii*) and potentially including tanoak (*Lithocarpus densiflorus*) and evergreen oak (*Quercus*) species; and a xeric evergreen needle-leaf community, represented by ponderosa pine.

### **OA (Oak Savanna)**

Open broadleaf deciduous communities, typically oak. May include other species, but must have canopy cover below 25%. This group includes most prairie and savanna.

### **OW (Oak Woodland)**

Broadleaf deciduous woodland, typically oak. May include other species. Must have canopy cover between 25% and 60%.

### **OD (Oak over Douglas-fir)**

Xeric woodlands of broadleaf deciduous trees growing above needleleaf evergreens.

### **DO (Douglas-fir over oak)**

Woodlands and low-density forests of needleleaf evergreen trees growing above xeric broadleaf deciduous trees.

### **DD (Dry Douglas-fir)**

Less mesic deciduous woodlands and low-density forests. These may contain a wide variety of species, but Douglas-fir typically dominates.

### **BM (Bigleaf Maple)**

Mesic broadleaf deciduous forest, big leaf maple usually dominates. This may include a substantial component of mesic needleleaf evergreen trees.

### **DM (Douglas-fir and Maple)**

Mesic mixed needleleaf evergreen and broadleaf deciduous forest. The typical needleleaf evergreen species is Douglas-fir, but there is also a large grand fir component. The typical broadleaf deciduous species is big leaf maple. The needleleaf evergreen component must be dominant over the broadleaf deciduous component.

### **DG (Douglas-fir and Grand fir)**

Mesic needleleaf evergreen forest. Grand fir is the dominant species, but there may be substantial quantities of Douglas-fir and big leaf maple.

## **M (Madrone)**

Systems dominated by evergreen broadleaf species, typified by Pacific madrone. This includes prairie, savanna and woodland systems, but must not include a substantial Douglas-fir component.

## **MD (Madrone over Douglas-fir)**

Systems dominated by evergreen broadleaf species, with a substantial component of Douglas-fir in the understory.

## **P (Pine)**

Systems dominated by xeric evergreen species, typified by ponderosa pine. This includes prairie, savanna and woodland systems.

## **CTSS**

The **ctss** (cover type, structural stage) description of a STM state is a concatenation of five components.

First is the “row” or “climax community type”:

|           |                                |
|-----------|--------------------------------|
| <b>oa</b> | Deciduous oak savanna          |
| <b>ow</b> | Deciduous oak woodland         |
| <b>od</b> | Deciduous oak over Douglas-fir |
| <b>do</b> | Douglas-fir over oak           |
| <b>dd</b> | Less mesic Douglas-fir         |
| <b>bm</b> | Big leaf maple                 |
| <b>dm</b> | More mesic Douglas-fir         |
| <b>dg</b> | Douglas-fir and grand fir      |
| <b>m</b>  | Madrone                        |
| <b>md</b> | Madrone over Douglas-fir       |
| <b>p</b>  | Xeric evergreen needle leaf    |

Next is size class:

|            |                                             |
|------------|---------------------------------------------|
| <b>gfp</b> | Grass-forb, post-disturbance                |
| <b>gf</b>  | Grass-forb                                  |
| <b>sh-</b> | Low density shrub                           |
| <b>y</b>   | young (<5” diameter-at-breast-height [dbh]) |
| <b>p</b>   | pole (5-10” dbh)                            |
| <b>s</b>   | small (10-20” dbh)                          |
| <b>l</b>   | large (>20” dbh)                            |

Canopy closure is next, although it is only included for size classes **p**, **s** and **l**:

|          |                                        |
|----------|----------------------------------------|
| <b>o</b> | Open canopy (<25% canopy cover)        |
| <b>m</b> | Medium closure (25 – 60% canopy cover) |
| <b>c</b> | Closed canopy (>60% canopy cover)      |

Next is the canopy layering, included only for size classes **s** and **m**:

|          |                            |
|----------|----------------------------|
| <b>1</b> | Single canopy layer        |
| <b>2</b> | More than one canopy layer |

Finally, there may be “**rf**” appended, indicating that the state has reduced fuels

## 2. List of Land Use/Land Cover and Vegetation Types

| LULC and Vegetation States in SWCNH Envision                                           |                                    |      |                             |                 |
|----------------------------------------------------------------------------------------|------------------------------------|------|-----------------------------|-----------------|
| last modified, 10/12/2013                                                              |                                    |      |                             |                 |
| Note that only the vegclass number is available as an attribute reference in Envision. |                                    |      |                             |                 |
|                                                                                        |                                    |      |                             |                 |
| Legend                                                                                 | Vegclass                           | ctss | Description                 |                 |
|                                                                                        | LULC (Land Use/Land Cover) Classes |      |                             |                 |
|                                                                                        | 1                                  | -    | Residential 0 - 4 DU/ac     |                 |
|                                                                                        | 2                                  | -    | Residential 4 - 9 DU/ac     |                 |
|                                                                                        | 3                                  | -    | Residential 9 - 16 DU/ac    |                 |
|                                                                                        | 4                                  | -    | Residential > 16 DU/ac      |                 |
|                                                                                        | 6                                  | -    | Commercial                  |                 |
|                                                                                        | 7                                  | -    | Commercial/Industrial       |                 |
|                                                                                        | 8                                  | -    | Industrial                  |                 |
|                                                                                        | 10                                 | -    | Residential and commercial  |                 |
|                                                                                        | 11                                 | -    | Urban non-vegetated unknown |                 |
|                                                                                        | 18                                 | -    | Railroad                    |                 |
|                                                                                        | 19                                 | -    | Primary roads               |                 |
|                                                                                        | 20                                 | -    | Secondary roads             |                 |
|                                                                                        | 21                                 | -    | Light duty roads            |                 |
|                                                                                        | 24                                 | -    | Rural non-vegetated unknown |                 |
|                                                                                        | 29                                 | -    | Main channel non-vegetated  |                 |
|                                                                                        | 33                                 | -    | Water                       |                 |
|                                                                                        | 40                                 | -    | Snow/ice                    |                 |
|                                                                                        | 42                                 | -    | Barren                      |                 |
|                                                                                        | 49                                 | -    | Urban tree overstory        |                 |
|                                                                                        | 66                                 | -    | Hybrid poplar               |                 |
|                                                                                        | 67                                 | -    | Grass seed                  |                 |
|                                                                                        | 68                                 | -    | Row crop                    |                 |
|                                                                                        | 71                                 | -    | Grains                      |                 |
|                                                                                        | 72                                 | -    | Nursery                     |                 |
|                                                                                        | 73                                 | -    | Berries & Vineyards         |                 |
|                                                                                        | 74                                 | -    | Double cropping             |                 |
|                                                                                        | 75                                 | -    | Hops                        |                 |
|                                                                                        | 76                                 | -    | Mint                        |                 |
|                                                                                        | 78                                 | -    | Sugar beet seed             |                 |
|                                                                                        | 83                                 | -    | Hay                         |                 |
|                                                                                        | 85                                 | -    | Pasture                     |                 |
|                                                                                        | 88                                 | -    | Bare/fallow                 |                 |
|                                                                                        | 89                                 | -    | Flooded/marsh               |                 |
|                                                                                        | 90                                 | -    | Field crop                  |                 |
|                                                                                        |                                    | 91   | -                           | Turfgrass/park  |
|                                                                                        |                                    | 92   | -                           | Orchard         |
|                                                                                        |                                    | 93   | -                           | Christmas trees |
|                                                                                        |                                    | 95   | -                           | Woodlot         |

| LULC and Vegetation States in SWCNH Envision      |     |        |                                                                                      |
|---------------------------------------------------|-----|--------|--------------------------------------------------------------------------------------|
| Current Unmanaged Successional Vegetation Classes |     |        |                                                                                      |
|                                                   | 200 | oagf   | Oak savanna, grass-forb stage (upland prairie)                                       |
|                                                   | 201 | oay    | Oak savanna, saplings                                                                |
|                                                   | 202 | oapo   | Oak savanna, pole-sized trees                                                        |
|                                                   | 203 | oaso1  | Oak savanna, small trees, one layer                                                  |
|                                                   | 204 | oalo1  | Oak savanna, large trees, one layer                                                  |
|                                                   | 209 | oagfp  | Oak savanna, grass-forb stage, post-disturbance (upland prairie)                     |
|                                                   | 210 | owpm   | Oak woodland, pole-sized trees                                                       |
|                                                   | 211 | owsm1  | Oak woodland, small trees, one layer                                                 |
|                                                   | 212 | owlm1  | Oak woodland, large trees, one layer                                                 |
|                                                   | 220 | odsm2  | Oak-fir woodland, small trees, two layers                                            |
|                                                   | 221 | odlm2  | Oak-fir woodland, large trees, two layers                                            |
|                                                   | 230 | dogf   | Douglas-fir w/oak, grass-forb stage                                                  |
|                                                   | 231 | doy    | Douglas-fir w/oak, saplings                                                          |
|                                                   | 232 | dopm   | Douglas-fir w/oak, pole-sized trees, medium to closed canopy                         |
|                                                   | 233 | dosm2  | Douglas-fir w/oak, small trees, medium to closed canopy, two layers                  |
|                                                   | 234 | dolm2  | Douglas-fir w/oak, large trees, medium to closed canopy, two layers                  |
|                                                   | 239 | dogfp  | Douglas-fir w/oak, grass-forb stage, post-disturbance                                |
|                                                   | 240 | ddgf   | Douglas-fir, grass-forb stage                                                        |
|                                                   | 241 | ddy    | Douglas-fir, saplings                                                                |
|                                                   | 242 | ddpo   | Douglas-fir, pole-sized trees, open canopy                                           |
|                                                   | 243 | ddso1  | Douglas-fir, small trees, open canopy, one layer                                     |
|                                                   | 244 | ddlo1  | Douglas-fir, large trees, open canopy, one layer                                     |
|                                                   | 245 | ddpm   | Douglas-fir, pole-sized trees, medium to closed canopy                               |
|                                                   | 246 | ddsm2  | Douglas-fir, small trees, medium to closed canopy, two layers                        |
|                                                   | 247 | ddlm2  | Douglas-fir, large trees, medium to closed canopy, two layers                        |
|                                                   | 259 | ddgfp  | Douglas-fir, grass-forb stage, post-disturbance                                      |
|                                                   | 260 | dmgf   | Mesic mixed Douglas-fir & broadleaf deciduous, grass-forb stage                      |
|                                                   | 261 | dm y   | Mesic mixed Douglas-fir & broadleaf deciduous, saplings                              |
|                                                   | 262 | dmpm   | Mesic mixed Douglas-fir & broadleaf deciduous, pole-sized trees, medium canopy       |
|                                                   | 263 | dmsm1  | Mesic mixed Douglas-fir & broadleaf deciduous, small trees, medium canopy, one layer |
|                                                   | 264 | dmlm1  | Mesic mixed Douglas-fir & broadleaf deciduous, large trees, medium canopy, one layer |
|                                                   | 265 | dmpc   | Mesic mixed Douglas-fir & broadleaf deciduous, pole-sized trees, closed canopy       |
|                                                   | 269 | dmgfp  | Mesic mixed Douglas-fir & broadleaf deciduous, grass-forb stage, post-disturbance    |
|                                                   | 270 | dgsc2  | Mesic needleleaf evergreen, small trees, closed canopy, two layers                   |
|                                                   | 271 | dglc2  | Mesic needleleaf evergreen, large trees, closed canopy, two layers                   |
|                                                   | 280 | bm gf  | Mesic broadleaf deciduous, grass-forb stage                                          |
|                                                   | 281 | bmy    | Mesic broadleaf deciduous, saplings                                                  |
|                                                   | 282 | bmpm   | Mesic broadleaf deciduous, pole-sized trees, medium canopy                           |
|                                                   | 285 | bmsc1  | Mesic broadleaf deciduous, small trees, closed canopy, one layer                     |
|                                                   | 286 | bmlc1  | Mesic broadleaf deciduous, large trees, closed canopy, one layer                     |
|                                                   | 289 | bm gfp | Mesic broadleaf deciduous, grass-forb stage, post-disturbance                        |

| LULC and Vegetation States in SWCNH Envision                           |     |          |                                                                                                  |
|------------------------------------------------------------------------|-----|----------|--------------------------------------------------------------------------------------------------|
| Reduced Fuels States - Current Managed Successional Vegetation Classes |     |          |                                                                                                  |
|                                                                        | 300 | oagfrf   | Oak savanna, grass-forb stage, reduced fuels (upland prairie)                                    |
|                                                                        | 301 | oayrf    | Oak savanna, saplings, reduced fuels                                                             |
|                                                                        | 302 | oaporf   | Oak savanna, pole-sized trees, reduced fuels                                                     |
|                                                                        | 303 | oaso1rf  | Oak savanna, small trees, one layer, reduced fuels                                               |
|                                                                        | 304 | oalo1rf  | Oak savanna, large trees, one layer, reduced fuels                                               |
|                                                                        | 308 | owgfrf   | Oak woodland, grass-forb stage, reduced fuels                                                    |
|                                                                        | 309 | owyrf    | Oak woodland, saplings, reduced fuels                                                            |
|                                                                        | 310 | owpmrf   | Oak woodland, pole-sized trees, medium canopy, reduced fuels                                     |
|                                                                        | 311 | owsm1rf  | Oak woodland, small trees, one layer, reduced fuels                                              |
|                                                                        | 312 | owlm1rf  | Oak woodland, large trees, one layer, reduced fuels                                              |
|                                                                        | 318 | oagfprf  | Oak savanna, grass-forb stage, post-disturbance, reduced fuels (upland prairie)                  |
|                                                                        | 319 | owgfprf  | Oak woodland, grass-forb stage, post-disturbance, reduced fuels                                  |
|                                                                        | 320 | odsm2rf  | Oak-fir woodland, small trees, two layers, reduced fuels                                         |
|                                                                        | 321 | odlm2rf  | Oak-fir woodland, large trees, two layers, reduced fuels                                         |
|                                                                        | 333 | dosm2rf  | Douglas-fir w/oak woodland, small trees, two layers, reduced fuels                               |
|                                                                        | 334 | dolm2rf  | Douglas-fir w/oak woodland, large trees, two layers, reduced fuels                               |
|                                                                        | 339 | dogfprf  | Douglas-fir w/oak, grass-forb stage, post-disturbance, reduced fuels                             |
|                                                                        | 340 | ddgfrf   | Douglas-fir, grass-forb stage, reduced fuels                                                     |
|                                                                        | 341 | ddyrf    | Douglas-fir, saplings, reduced fuels                                                             |
|                                                                        | 342 | ddporf   | Douglas-fir woodland, pole-sized trees, reduced fuels                                            |
|                                                                        | 343 | ddso1rf  | Douglas-fir woodland, small trees, one layer, reduced fuels                                      |
|                                                                        | 344 | ddlo1rf  | Douglas-fir woodland, large trees, one layer, reduced fuels                                      |
|                                                                        | 346 | ddsm2rf  | Douglas-fir woodland, small trees, two layers, reduced fuels                                     |
|                                                                        | 347 | ddlm2rf  | Douglas-fir woodland, large trees, two layers, reduced fuels                                     |
|                                                                        | 359 | ddgfprf  | Douglas-fir, grass-forb stage, post-disturbance, reduced fuels                                   |
|                                                                        | 362 | dmpmrf   | Mesic mixed Douglas-fir & broadleaf deciduous woodland, pole-sized trees, reduced fuels          |
|                                                                        | 363 | dmsm1rf  | Mesic mixed Douglas-fir & broadleaf deciduous woodland, small trees, one layer, reduced fuels    |
|                                                                        | 364 | dmlm1rf  | Mesic mixed Douglas-fir & broadleaf deciduous woodland, large trees, one layer, reduced fuels    |
|                                                                        | 369 | dmgfprf  | Mesic mixed Douglas-fir & broadleaf deciduous, grass-forb stage, post-disturbance, reduced fuels |
|                                                                        | 370 | dgsc2rf  | Mesic needleleaf evergreen woodland, small trees, two layers, reduced fuels                      |
|                                                                        | 371 | dglc2rf  | Mesic needleleaf evergreen woodland, large trees, two layers, reduced fuels                      |
|                                                                        | 380 | bm gfrf  | Mesic broadleaf deciduous, grass-forb stage, reduced fuels                                       |
|                                                                        | 381 | bmyrf    | Mesic broadleaf deciduous, saplings, reduced fuels                                               |
|                                                                        | 382 | bmpmrf   | Mesic broadleaf deciduous woodland, pole-sized trees, reduced fuels                              |
|                                                                        | 385 | bmsc1rf  | Mesic broadleaf deciduous woodland, small trees, one layer, reduced fuels                        |
|                                                                        | 386 | bm lc1rf | Mesic broadleaf deciduous woodland, large trees, one layer, reduced fuels                        |
|                                                                        | 389 | bm gfprf | Mesic broadleaf deciduous, grass-forb stage, post-disturbance, reduced fuels                     |

| LULC and Vegetation States in SWCNH Envision                           |     |         |                                                                                    |
|------------------------------------------------------------------------|-----|---------|------------------------------------------------------------------------------------|
| Plantation Conifer Sequence                                            |     |         |                                                                                    |
|                                                                        | 440 | ddgfpl  | Douglas-fir, grass-forb stage, plantation                                          |
|                                                                        | 441 | ddypl   | Douglas-fir, saplings, plantation                                                  |
|                                                                        | 442 | ddpopl  | Douglas-fir, pole-sized trees, open canopy, plantation                             |
|                                                                        | 443 | ddsc1pl | Douglas-fir, small trees, closed canopy, one layer, plantation                     |
|                                                                        | 444 | ddlc1pl | Douglas-fir, large trees, closed canopy, one layer, plantation                     |
|                                                                        | 447 | ddgc1pl | Douglas-fir, giant trees, closed canopy, one layer, plantation                     |
|                                                                        | 448 | ddgc2pl | Douglas-fir, giant trees, closed canopy, two layers, plantation                    |
| Emerging Future Successional Vegetation Classes                        |     |         |                                                                                    |
|                                                                        | 499 | pgf     | Pine savanna, grass-forb stage (upland prairie)                                    |
|                                                                        | 500 | py      | Pine savanna, saplings                                                             |
|                                                                        | 501 | ppo     | Pine savanna, pole-sized trees                                                     |
|                                                                        | 502 | pso1    | Pine savanna, small trees, one layer                                               |
|                                                                        | 503 | plo1    | Pine savanna, large trees, one layer                                               |
|                                                                        | 504 | ppm     | Pine woodland, pole-sized trees                                                    |
|                                                                        | 505 | psm2    | Pine woodland, small trees, two layers                                             |
|                                                                        | 506 | plm2    | Pine woodland, large trees, two layers                                             |
|                                                                        | 509 | pgfp    | Pine savanna, grass-forb stage, post-disturbance                                   |
|                                                                        | 520 | mgf     | Madrone, grass-forb stage                                                          |
|                                                                        | 521 | my      | Madrone, saplings                                                                  |
|                                                                        | 525 | mpm     | Madrone, pole-sized trees, medium canopy                                           |
|                                                                        | 526 | msm1    | Madrone, small trees, medium canopy, one layer                                     |
|                                                                        | 527 | mlm1    | Madrone, large trees, medium canopy, one layer                                     |
|                                                                        | 529 | mgfp    | Madrone, grass-forb stage, post-disturbance                                        |
|                                                                        | 540 | mdsm2   | Mixed madrone & Douglas-fir, small trees, medium canopy, two layers                |
|                                                                        | 541 | mdlm2   | Mixed madrone & Douglas-fir, large trees, medium canopy, two layers                |
| Reduced Fuels States - Emerging Future Successional Vegetation Classes |     |         |                                                                                    |
|                                                                        | 599 | pgfrf   | Pine savanna, grass-forb stage, reduced fuels (upland prairie)                     |
|                                                                        | 600 | pyrf    | Pine savanna, saplings, reduced fuels                                              |
|                                                                        | 601 | pporf   | Pine savanna, pole-sized trees, open canopy, reduced fuels                         |
|                                                                        | 602 | pso1rf  | Pine savanna, small trees, one layer, reduced fuels                                |
|                                                                        | 603 | plo1rf  | Pine savanna, large trees, one layer, reduced fuels                                |
|                                                                        | 605 | psm1rf  | Pine woodland, small trees, one layer, reduced fuels                               |
|                                                                        | 606 | plm1rf  | Pine woodland, large trees, one layer, reduced fuels                               |
|                                                                        | 609 | pgfprf  | Pine woodland, grass-forb stage, post-disturbance, reduced fuels (upland prairie)  |
|                                                                        | 620 | mgfrf   | Madrone, grass-forb stage, reduced fuels                                           |
|                                                                        | 621 | myrf    | Madrone, saplings, reduced fuels                                                   |
|                                                                        | 625 | mpmrf   | Madrone, pole-sized trees, reduced fuels                                           |
|                                                                        | 626 | msm1rf  | Madrone, small trees, medium canopy, one layer, reduced fuels                      |
|                                                                        | 627 | mlm1rf  | Madrone, large trees, medium canopy, one layer, reduced fuels                      |
|                                                                        | 629 | mgfprf  | Madrone, grass-forb stage, post-disturbance, reduced fuels                         |
|                                                                        | 640 | mdsm2rf | Mixed madrone & Douglas-fir, small trees, medium canopy, two layers, reduced fuels |
|                                                                        | 641 | mdlm2rf | Mixed madrone & Douglas-fir, large trees, medium canopy, two layers, reduced fuels |

### 3. Plot Selection for Calculation of State-and-Transition Probabilities for the CNH Project

Peter Gould and Connie Harrington, PNW Research Station

December 7, 2011

Note: this work was completed between August and October 2010. The work is summarized here.

#### **Introduction**

The purpose of this document is to describe the process of selecting plots to populate the transition probabilities for a state-and-transition model (STM). The goal was to identify a set of plots to represent each state. The plots were then projected using the forest vegetation simulator (FVS) and the future condition of each plot was once again classified into a state. The transition probabilities were calculated as the proportion of plots that moved from one state to another.

#### **Data Sources**

Bart Johnson's Joint Fire Sciences plots: primarily oak dominated in Willamette Valley

GAP plots from Jane Kurtis (?): primarily oak dominated in Willamette Valley

PNW Integrated database: Data from western Oregon from several sources including FIA (pre 2000), National Forest Inventories (i.e., CVS plots), and BLM plots.

Citation:

Hiserote and Waddell, 2005 Hiserote, B., Waddell, K., 2005. The PNW-FIA integrated database user guide (version 2.0). Data are available at:

<http://www.fs.fed.us/pnw/fia/publications/data/data.shtml>.

PNW FIA Annual Inventory: Data from recently measured FIA plots in western Oregon (2001-2008).

Citation:

US Forest Service, Forest Inventory and Analysis. FIA Datamart. <http://apps.fs.fed.us/fiadb-downloads/datamart.html>. Accessed 2010-09-01.

#### **Plot Selection**

Plots were selected using the following algorithm to identify the plots that were most representative of the study areas:

1. Each plot was classified into a state based on the STM criteria.

2. The distance from each plot to a centroid at 44.05N, 123.09W (Eugene, OR) was calculated. The distance was weighted so that the E-W distance was 1.7 times the N-S distance. The weighting reflects the greater uniformity of the Willamette Valley in the N-S direction versus the E-W direction.
3. All plots within 100 weighted km of Eugene, OR were selected (44.05N, 123.09W).
4. If fewer than 50 plots were selected for a state, then additional plots were selected by finding the closest plots to the centroid (44.05N, 123.09W) until 50 plots were located or no more plots were available.

Table 1. Selected plots.

| Source             | Number of Plots |
|--------------------|-----------------|
| GAP                | 342             |
| Joint Fire Science | 446             |
| PNW Annual FIA     | 377             |
| PNW-IDB            | 927             |

oagf

No Plots

oalo1

N Plots: 5  
Mean Dist: 35 km

oay

N Plots: 18  
Mean Dist: 65 km

owpm

N Plots: 50  
Mean Dist: 70 km

oapo

N Plots: 25  
Mean Dist: 89 km

owsm1

N Plots: 66  
Mean Dist: 33 km

oaso1

N Plots: 21  
Mean Dist: 88 km

owlm1

N Plots: 20  
Mean Dist: 45 km

odsm2

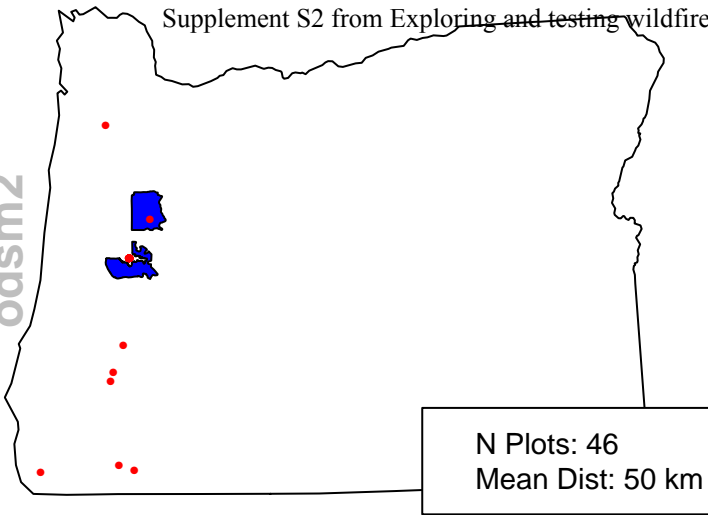

dopm

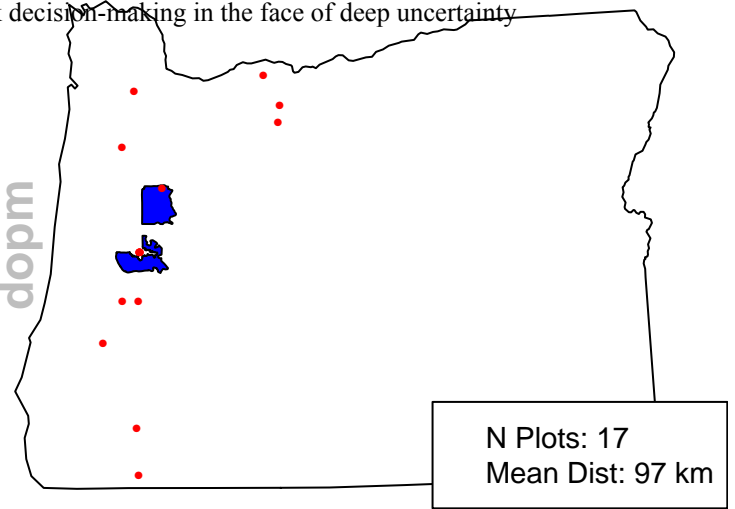

odlm2

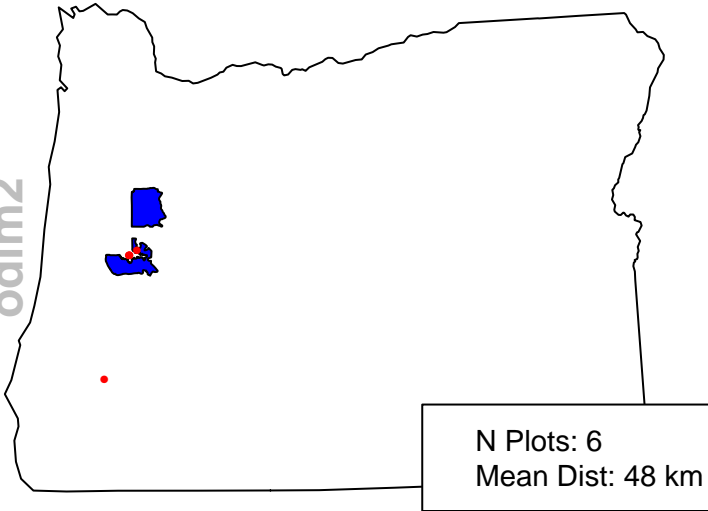

dosm2

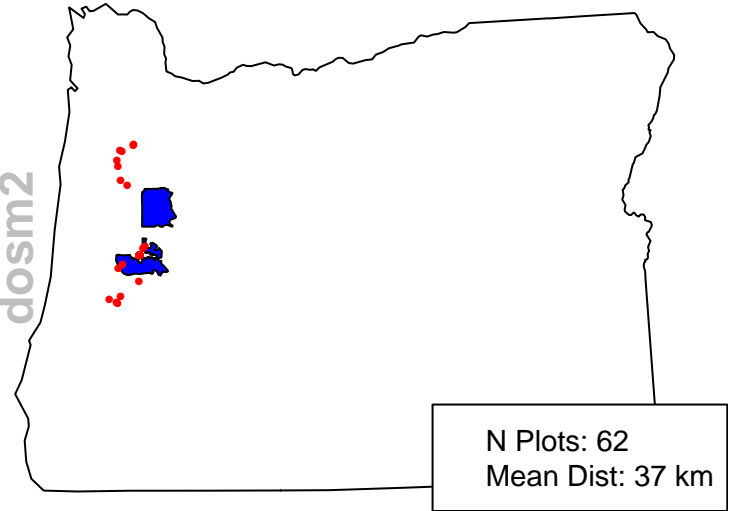

dogf

**No Plots**

dolm2

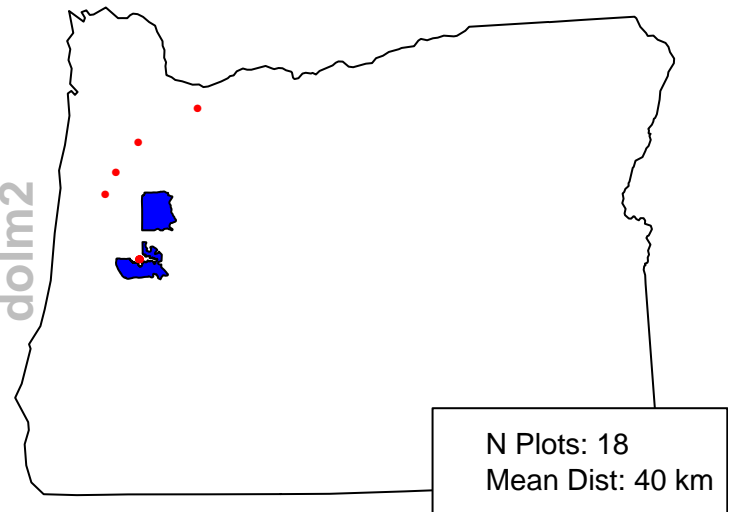

doy

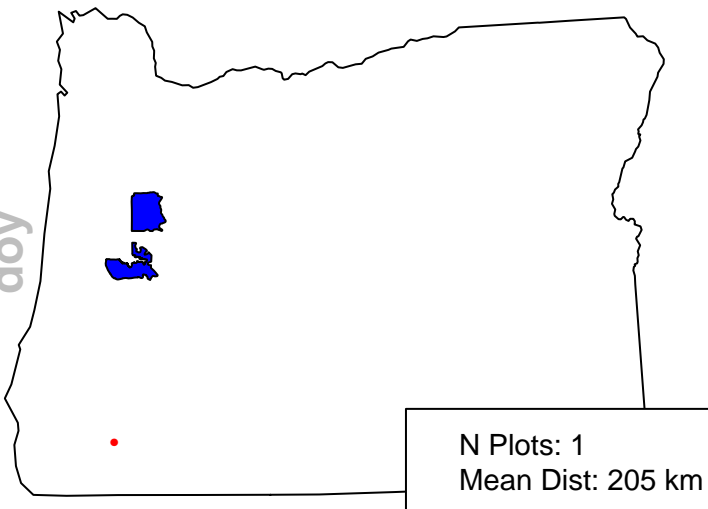

ddgf

**No Plots**

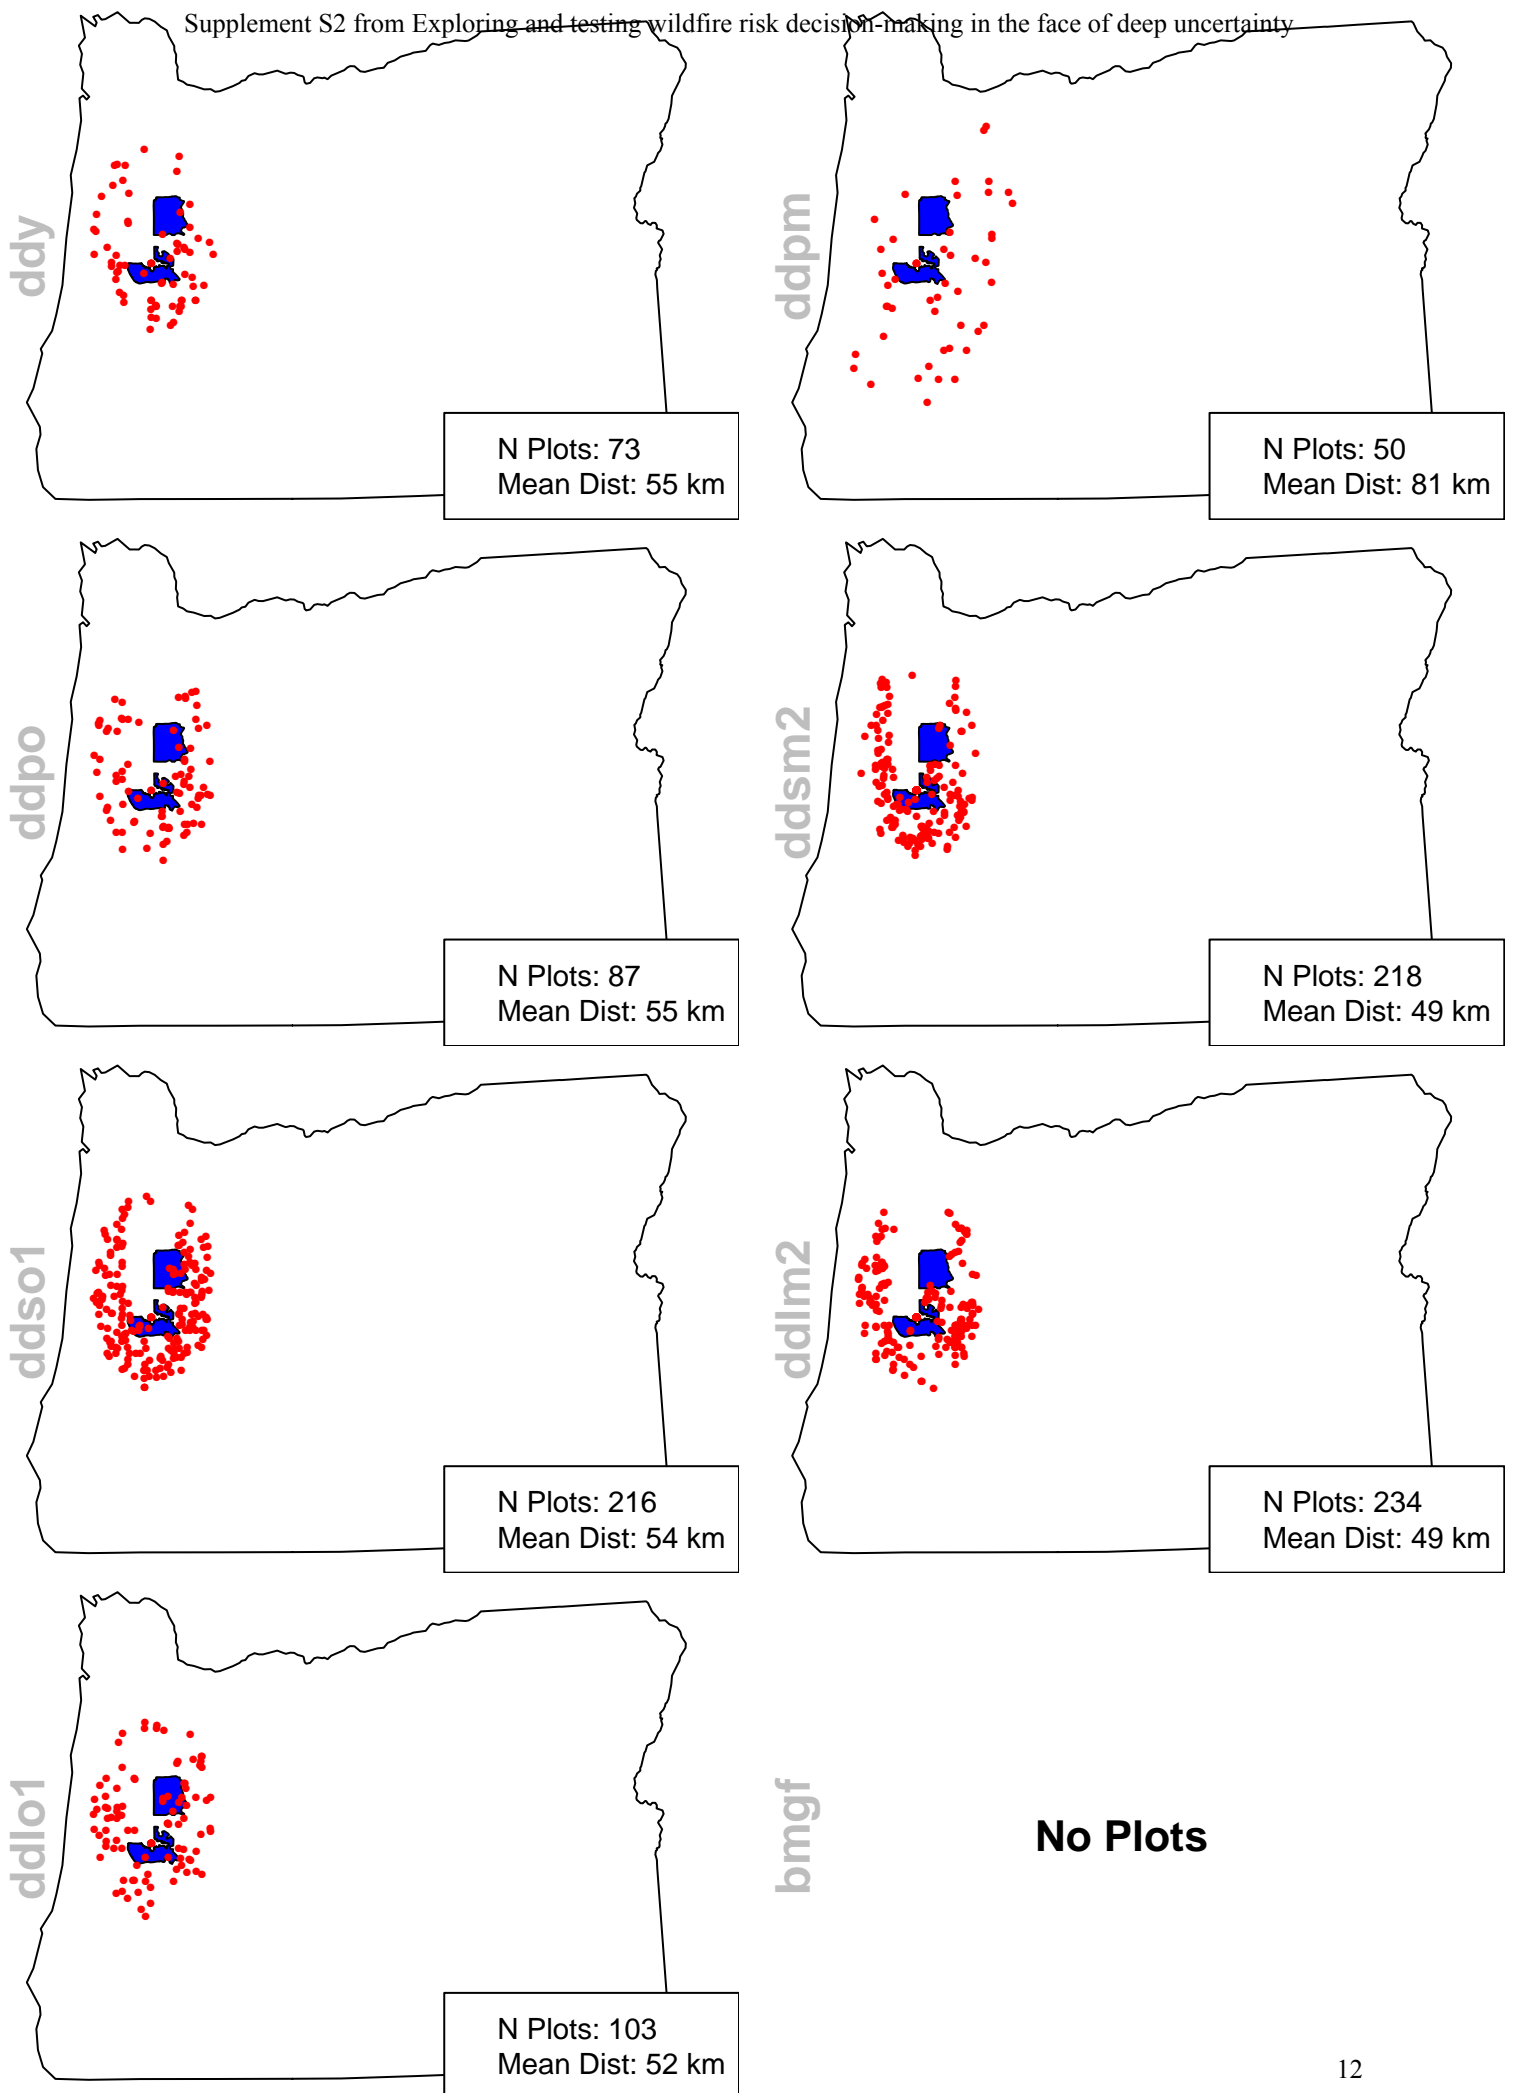

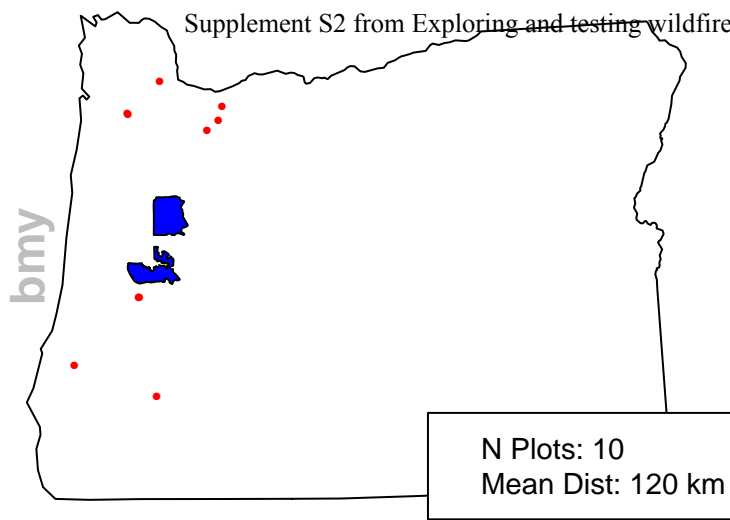

dmgf

No Plots

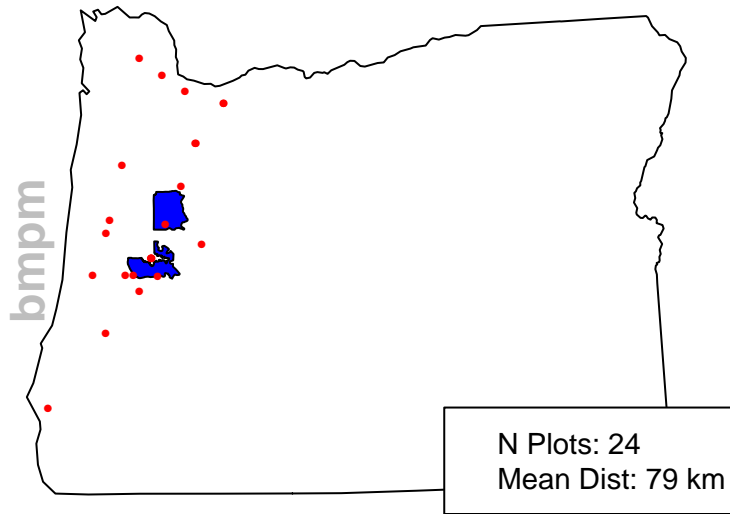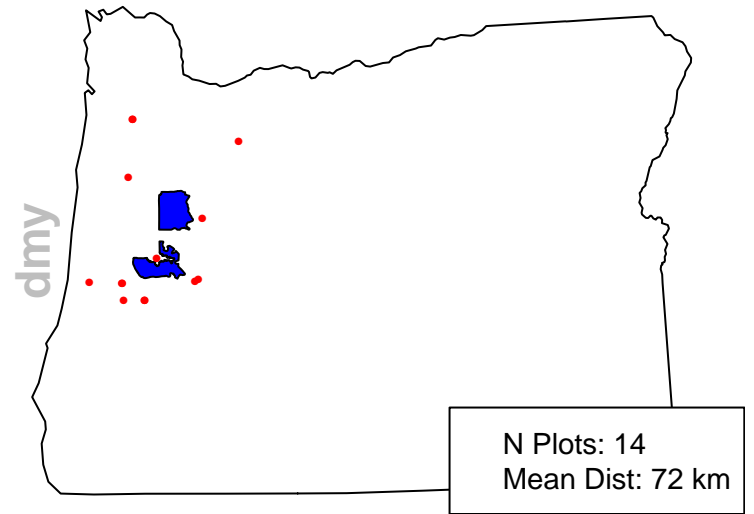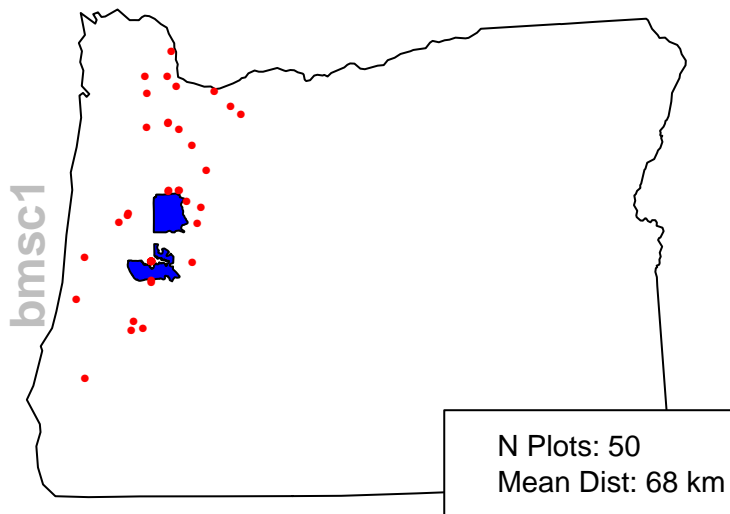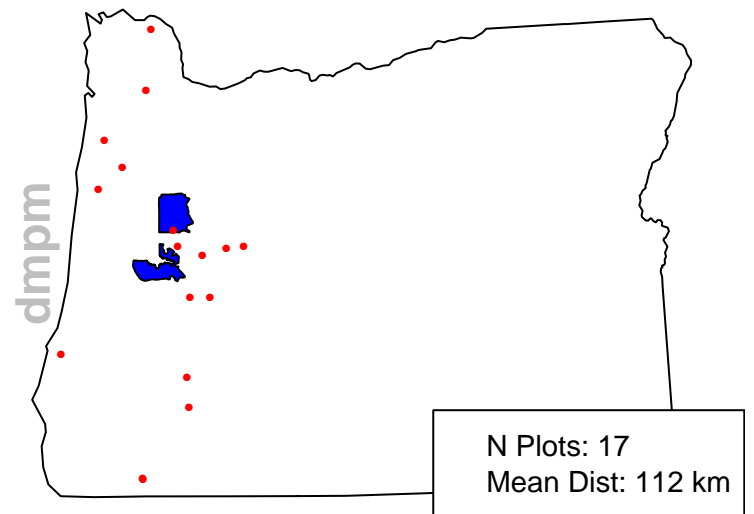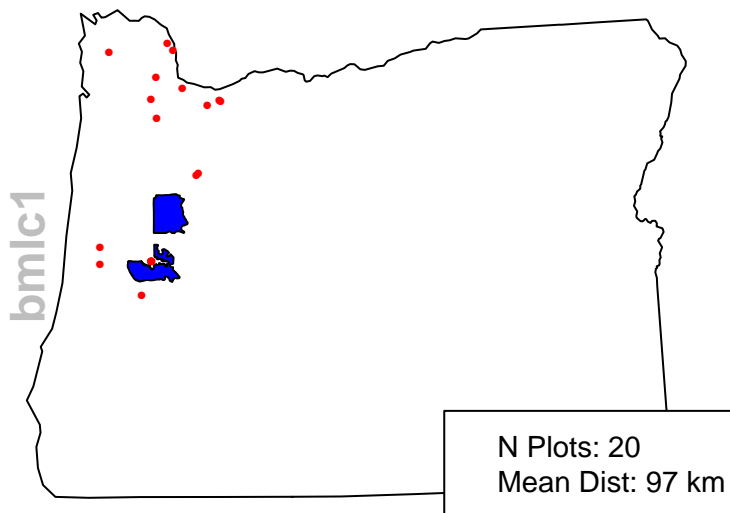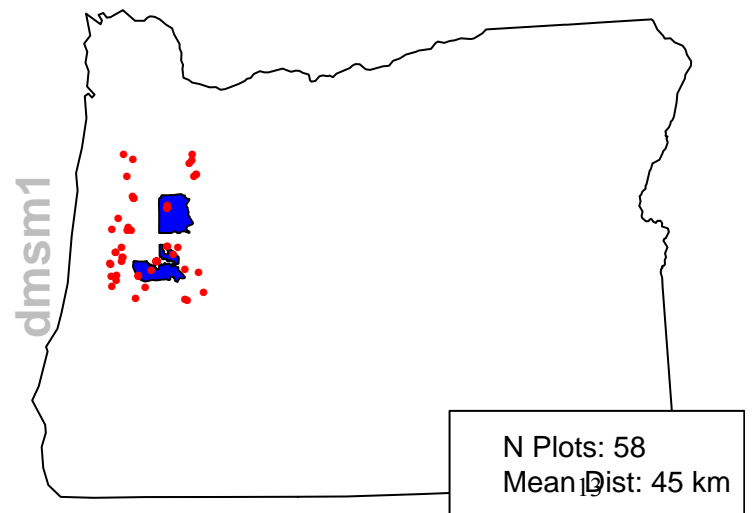

dm1m1

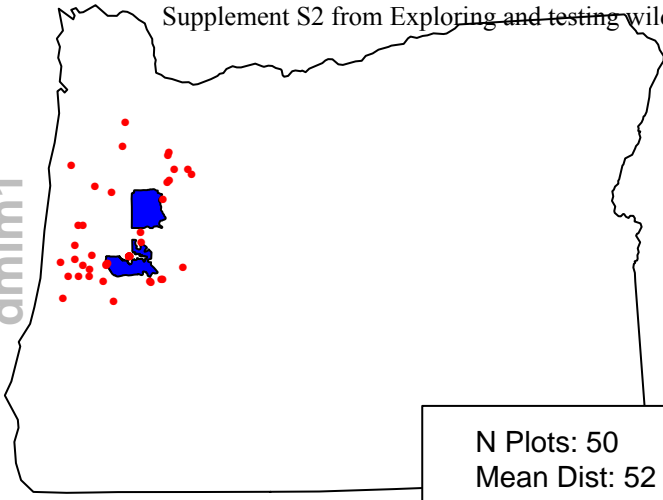

N Plots: 50  
Mean Dist: 52 km

opy

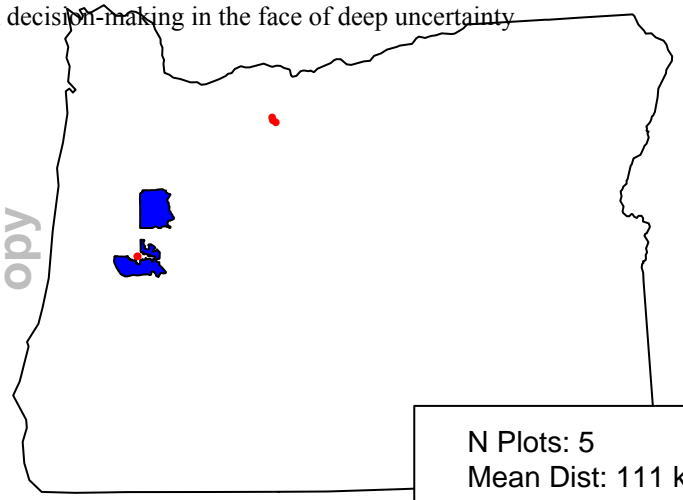

N Plots: 5  
Mean Dist: 111 km

dm1pc

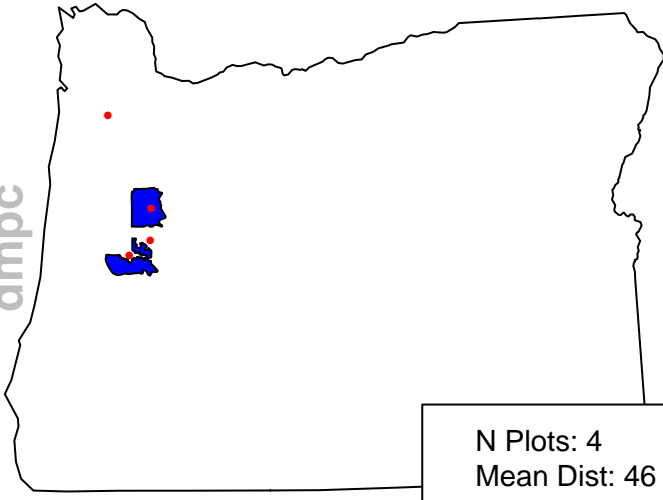

N Plots: 4  
Mean Dist: 46 km

oppo

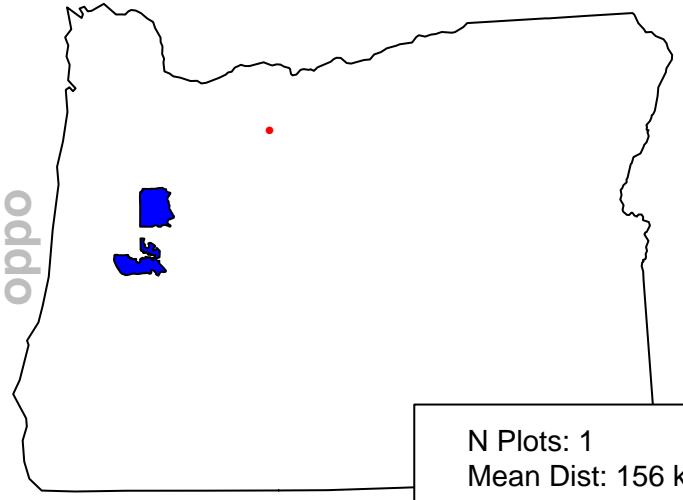

N Plots: 1  
Mean Dist: 156 km

dgsc2

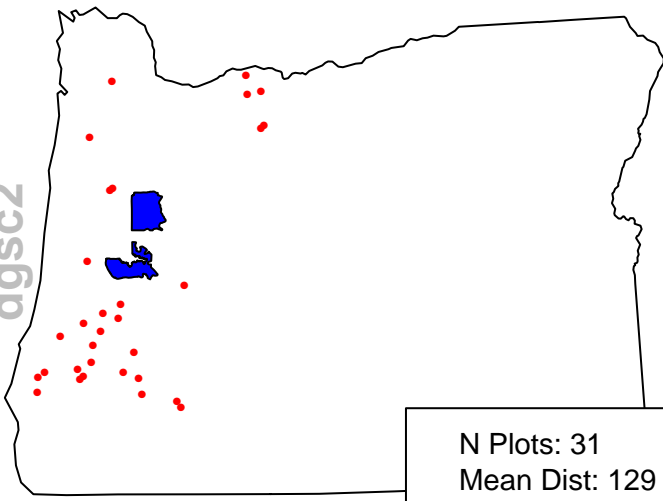

N Plots: 31  
Mean Dist: 129 km

opso1

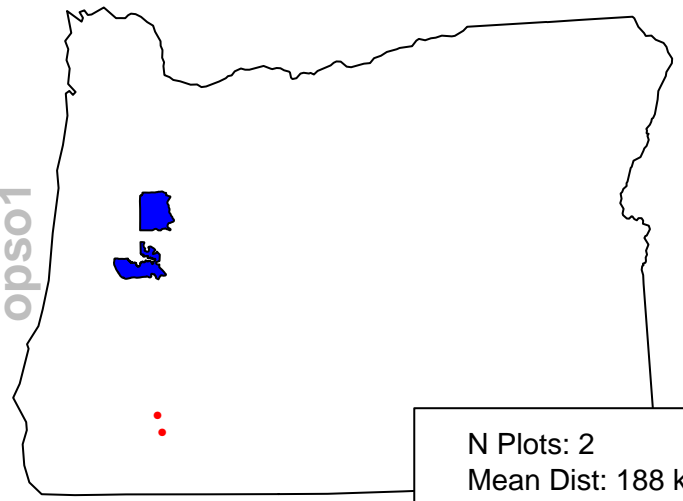

N Plots: 2  
Mean Dist: 188 km

dglc2

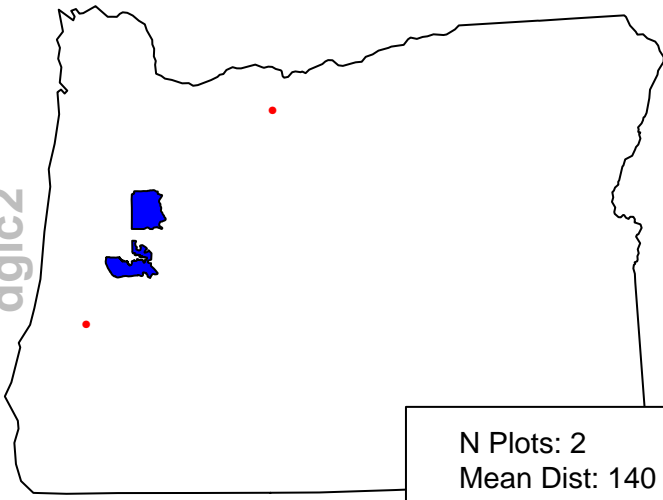

N Plots: 2  
Mean Dist: 140 km

oplo1

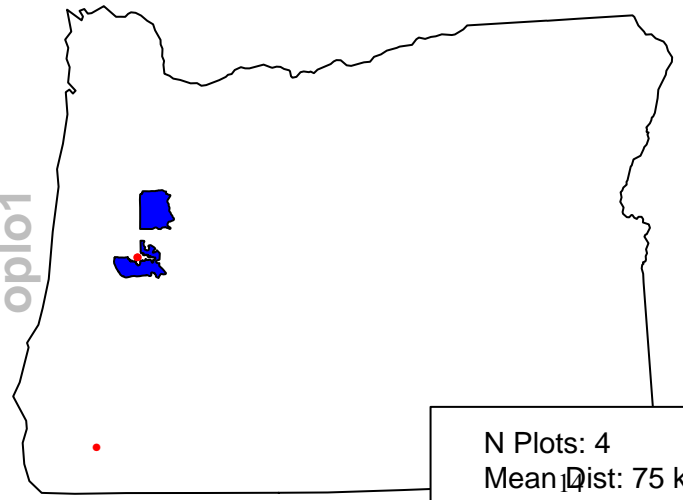

N Plots: 4  
Mean Dist: 75 km

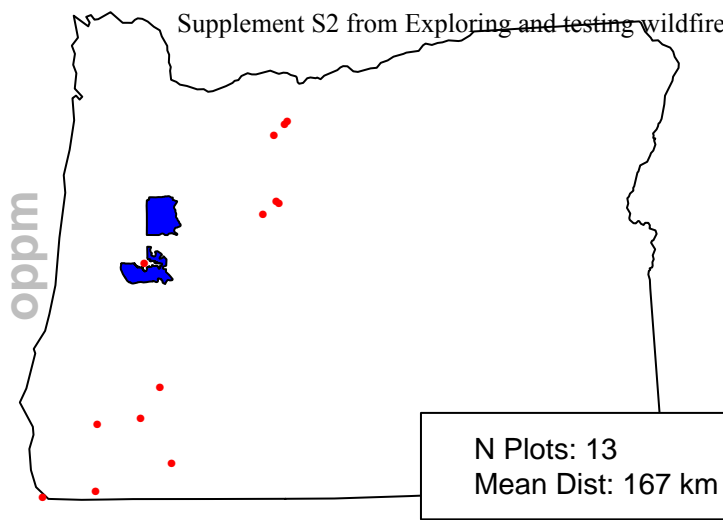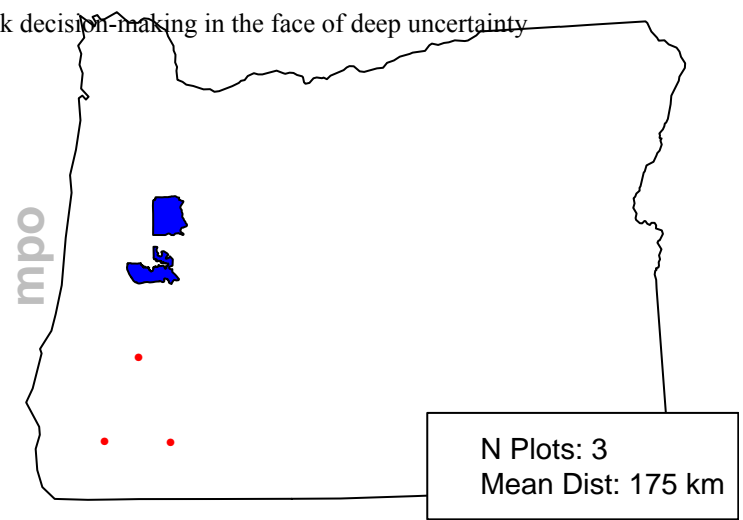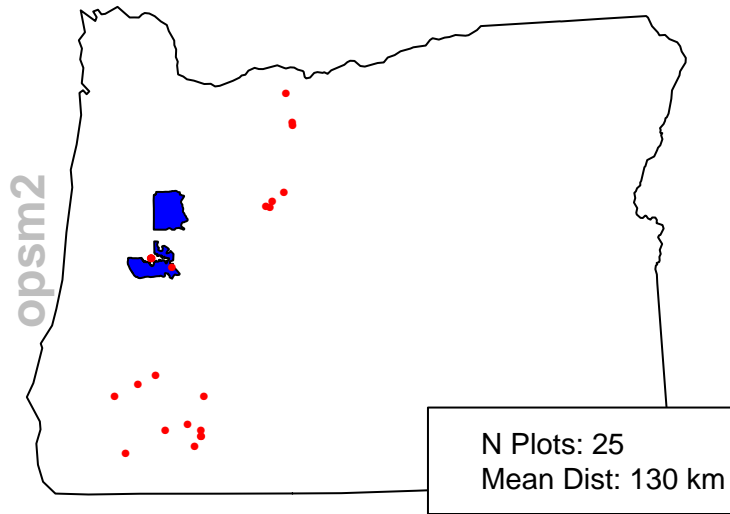

mso1

**No Plots**

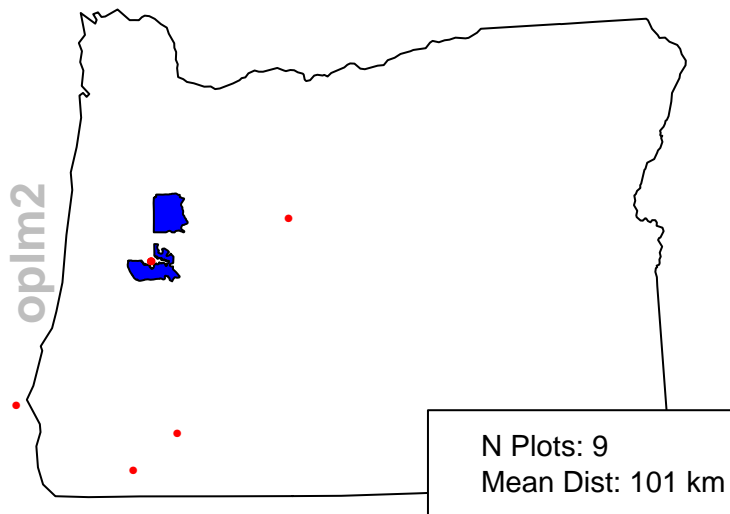

mlo1

**No Plots**

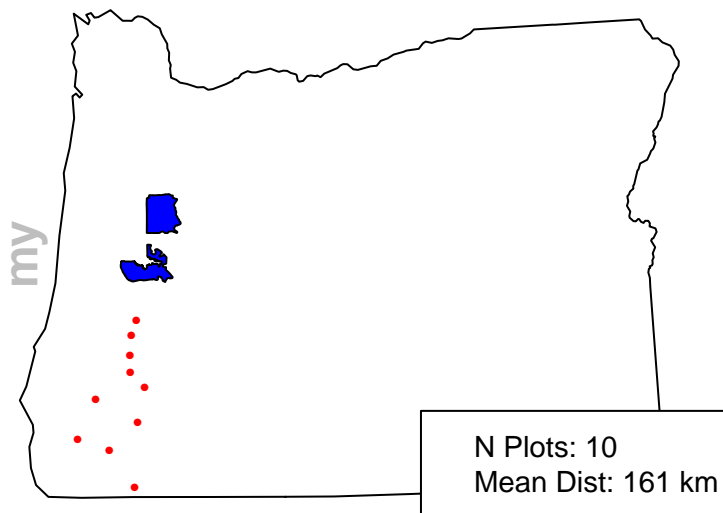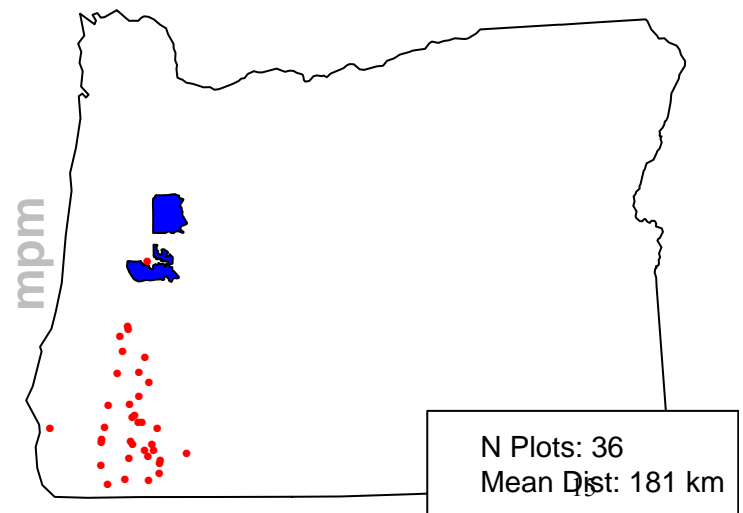

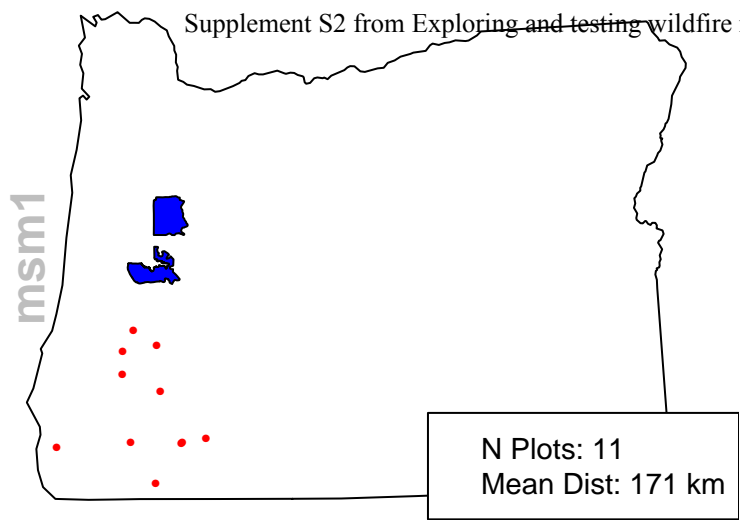

mlm1

**No Plots**

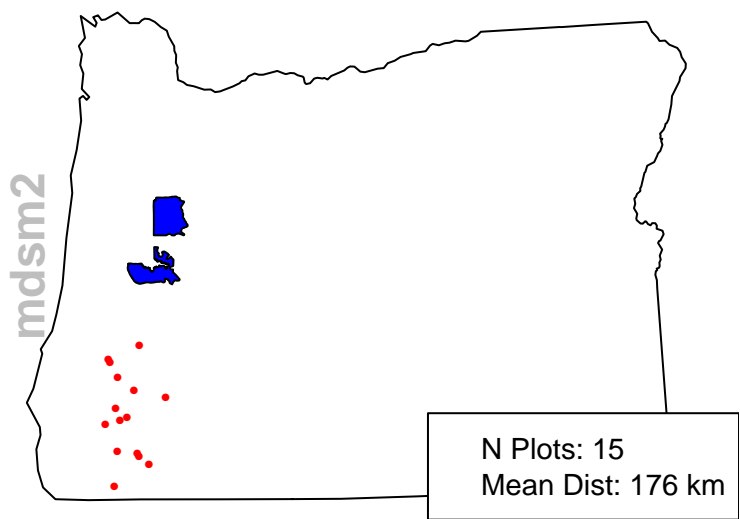

mdlm2

**No Plots**

#### 4. Tree Regeneration for States in the NSF CNH Project

Peter Gould and Connie Harrington

Pacific Northwest Research Station

August 31, 2010

The objective of this part of the project is to use existing data sources to evaluate regeneration for each forest state in the state-and-transition model. FVS does not add regeneration during projections unless a regeneration list is provided by the user. The regeneration list describes the species, size, and density of regeneration.

The annual FIA inventory system, which started in 2001, includes seedling plots that can be used to estimate regeneration densities. Seedlings are counted by species on four 1/300<sup>th</sup> acre plots on each FIA plot. Conifer seedlings are counted if they are > 0.5 ft tall and < 1.0 in DBH.

Hardwood seedlings are counted if they are > 1.0 ft tall and < 1.0 DBH. The most recent FIA database covers the period from 2001 to 2008. The annual inventory system is designed to measure 10 percent of plots each year, so the database includes about 80 percent of all FIA plots.

FIA plots were selected so that they fell within a rectangular area centered on the Willamette Valley. The selection yielded 628 plots (shown below).

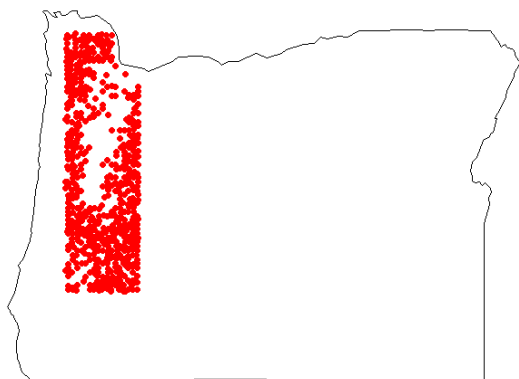

Plots were classified into states by summarizing the tree data and using the state definition table to assign states. The states were then merged with the seedling data so that seedling densities could be calculated by state. The summary of seedling densities in each state is attached.

The seedling summary can be used as one piece of information for determining regeneration composition. There was little or no data for most states other than those dominated by Douglas-fir (i.e., states beginning with “dd”). Regeneration for these states can be determined by combining similar states into more general categories. Additionally, the seedling data may need

to be modified to estimate regeneration of larger trees. FVS does not do a good job projecting the growth of small trees (< 3.0 in DBH). More realistic projection may be made by adding larger regeneration. If this approach is taken, some assumptions will need to be made regarding growth and survival of seedlings into larger size classes.

**Table 1. Seedling densities by species and state that were calculated from FIA data.**

| <b>State</b> | <b>Species</b> | <b>Trees / Acre</b> | <b>N Plots</b> |
|--------------|----------------|---------------------|----------------|
| bmlc1        | PSME           | 100                 | 3              |
| bmlc1        | CONU4          | 100                 | 3              |
| bmlc1        | FRLA           | 50                  | 3              |
| bmpm         | PSME           | 37                  | 6              |
| bmpm         | THPL           | 12                  | 6              |
| bmpm         | ACMA3          | 12                  | 6              |
| bmsc1        | ACMA3          | 64                  | 7              |
| bmsc1        | ALRU2          | 11                  | 7              |
| ddlm2        | PSME           | 273                 | 84             |
| ddlm2        | TSHE           | 194                 | 84             |
| ddlm2        | CHCHC4         | 46                  | 84             |
| ddlm2        | ALRU2          | 36                  | 84             |
| ddlm2        | CADE27         | 33                  | 84             |
| ddlm2        | ABGR           | 25                  | 84             |
| ddlm2        | TABR2          | 19                  | 84             |
| ddlm2        | THPL           | 19                  | 84             |
| ddlm2        | ABCO           | 16                  | 84             |
| ddlm2        | ACMA3          | 15                  | 84             |
| ddlm2        | ABAM           | 9                   | 84             |
| ddlm2        | PILA           | 5                   | 84             |
| ddlm2        | ABPR           | 3                   | 84             |
| ddlm2        | ACGL           | 3                   | 84             |
| ddlm2        | TSME           | 2                   | 84             |
| ddlm2        | CONU4          | 1                   | 84             |
| ddlo1        | PSME           | 163                 | 76             |
| ddlo1        | TSHE           | 38                  | 76             |
| ddlo1        | CHCHC4         | 26                  | 76             |
| ddlo1        | PREM           | 15                  | 76             |
| ddlo1        | THPL           | 14                  | 76             |
| ddlo1        | ABGR           | 13                  | 76             |
| ddlo1        | LIDE3          | 12                  | 76             |
| ddlo1        | ABCO           | 10                  | 76             |
| ddlo1        | CADE27         | 6                   | 76             |
| ddlo1        | ACMA3          | 5                   | 76             |

|       |        |     |     |
|-------|--------|-----|-----|
| ddlo1 | ALRU2  | 5   | 76  |
| ddlo1 | PIPO   | 3   | 76  |
| ddlo1 | TABR2  | 3   | 76  |
| ddlo1 | ARME   | 3   | 76  |
| ddlo1 | PILA   | 2   | 76  |
| ddpm  | ABGR   | 75  | 1   |
| ddpo  | PSME   | 225 | 51  |
| ddpo  | TSHE   | 60  | 51  |
| ddpo  | QUGA4  | 59  | 51  |
| ddpo  | ARME   | 35  | 51  |
| ddpo  | CHCHC4 | 25  | 51  |
| ddpo  | TABR2  | 22  | 51  |
| ddpo  | ACMA3  | 15  | 51  |
| ddpo  | ABGR   | 10  | 51  |
| ddpo  | PREM   | 7   | 51  |
| ddpo  | THPL   | 6   | 51  |
| ddpo  | ALRU2  | 6   | 51  |
| ddpo  | CADE27 | 4   | 51  |
| ddpo  | PILA   | 1   | 51  |
| ddpo  | CONU4  | 1   | 51  |
| ddpo  | PRUNU  | 1   | 51  |
| ddsm2 | PSME   | 106 | 27  |
| ddsm2 | ACMA3  | 67  | 27  |
| ddsm2 | ABGR   | 56  | 27  |
| ddsm2 | THPL   | 47  | 27  |
| ddsm2 | TABR2  | 25  | 27  |
| ddsm2 | TSHE   | 22  | 27  |
| ddsm2 | CADE27 | 11  | 27  |
| ddsm2 | TSME   | 6   | 27  |
| ddsm2 | ALRU2  | 6   | 27  |
| ddsm2 | ABCO   | 3   | 27  |
| ddsm2 | PILA   | 3   | 27  |
| ddsm2 | CHCHC4 | 3   | 27  |
| ddso1 | PSME   | 109 | 158 |
| ddso1 | TSHE   | 103 | 158 |
| ddso1 | THPL   | 49  | 158 |
| ddso1 | CHCHC4 | 23  | 158 |
| ddso1 | CADE27 | 13  | 158 |
| ddso1 | ABGR   | 10  | 158 |
| ddso1 | ABCO   | 9   | 158 |
| ddso1 | ACMA3  | 9   | 158 |
| ddso1 | ALRU2  | 9   | 158 |
| ddso1 | PREM   | 8   | 158 |

|       |        |     |     |
|-------|--------|-----|-----|
| ddso1 | ARME   | 7   | 158 |
| ddso1 | TABR2  | 6   | 158 |
| ddso1 | PRVI   | 3   | 158 |
| ddso1 | ABAM   | 2   | 158 |
| ddso1 | TSME   | 1   | 158 |
| ddso1 | FRLA   | 1   | 158 |
| ddso1 | PILA   | 0   | 158 |
| ddso1 | PIPO   | 0   | 158 |
| ddso1 | PRUNU  | 0   | 158 |
| ddy   | PSME   | 120 | 30  |
| ddy   | TSHE   | 27  | 30  |
| ddy   | ACMA3  | 20  | 30  |
| ddy   | THPL   | 15  | 30  |
| ddy   | PISI   | 7   | 30  |
| ddy   | ALRU2  | 5   | 30  |
| ddy   | PREM   | 5   | 30  |
| ddy   | ABGR   | 2   | 30  |
| ddy   | CADE27 | 2   | 30  |
| ddy   | CHCHC4 | 2   | 30  |
| ddy   | QUGA4  | 2   | 30  |
| dgsc2 | ABGR   | 400 | 3   |
| dgsc2 | PSME   | 200 | 3   |
| dgsc2 | TSHE   | 25  | 3   |
| dmlm1 | PREM   | 54  | 7   |
| dmlm1 | QUGA4  | 54  | 7   |
| dmlm1 | PSME   | 21  | 7   |
| dmlm1 | ACMA3  | 21  | 7   |
| dmlm1 | TSHE   | 11  | 7   |
| dmlm1 | MAFU   | 11  | 7   |
| dmpm  | THPL   | 37  | 2   |
| dmpm  | ACMA3  | 37  | 2   |
| dmsm1 | THPL   | 80  | 14  |
| dmsm1 | TSHE   | 43  | 14  |
| dmsm1 | PSME   | 37  | 14  |
| dmsm1 | ALRU2  | 11  | 14  |
| dmsm1 | PREM   | 11  | 14  |
| dmsm1 | CADE27 | 5   | 14  |
| dmsm1 | TABR2  | 5   | 14  |
| dmsm1 | ACMA3  | 5   | 14  |
| dmy   | NONE   | 0   | 1   |
| dolm2 | PSME   | 75  | 1   |
| dopm  | FRLA   | 25  | 3   |
| dosm2 | PSME   | 125 | 3   |

|       |        |     |   |
|-------|--------|-----|---|
| dosm2 | ARME   | 75  | 3 |
| dosm2 | QUGA4  | 50  | 3 |
| oalo1 | NONE   | 0   | 1 |
| oapo  | QUGA4  | 337 | 2 |
| oapo  | PSME   | 150 | 2 |
| oapo  | ACMA3  | 37  | 2 |
| oaso1 | PIPO   | 45  | 5 |
| oaso1 | PSME   | 45  | 5 |
| oaso1 | FRLA   | 45  | 5 |
| oaso1 | CADE27 | 15  | 5 |
| oaso1 | ACMA3  | 15  | 5 |
| oay   | QUGA4  | 450 | 1 |
| odlm2 | NONE   | 0   | 1 |
| odsm2 | FRLA   | 75  | 1 |
| owlm1 | NONE   | 0   | 2 |
| owpm  | QUGA4  | 75  | 1 |
| owsm1 | PREM   | 289 | 7 |
| owsm1 | QUGA4  | 54  | 7 |
| owsm1 | PIPO   | 32  | 7 |
| owsm1 | PSME   | 32  | 7 |
| owsm1 | FRLA   | 21  | 7 |
| owsm1 | ARME   | 11  | 7 |

---

## **5. Calculation of Current and Future Site Index for the Willamette Valley NSF-CNH Project**

**Peter Gould and Connie Harrington  
Pacific Northwest Research Station  
August 14, 2009**

### **Introduction**

The Willamette Valley NSF-CHN project is a coupled human-natural systems modeling project that seeks to incorporate vegetation dynamics, human decision making, and climate change into a model to project future landscape conditions for two study areas in the Willamette Valley, Oregon (the Eugene and Lebanon study areas). Current and future site productivity needs to be estimated at a fairly fine spatial scale within the study areas for vegetation modeling. The productivity metric is site index (*SI*) for Douglas-fir using King's (1966) curve with a base age of 50 years. *SI* will be used to project vegetation development using the Forest Vegetation Simulator (FVS) and for other purposes such as determining initial vegetation composition and changes in composition owing to climate change. The purpose of this report is to document how initial *SI* was estimated throughout the study areas based on soil and climate information.

### **Estimating Initial Site Index**

#### *Methods*

Our approach was to 1) retrieve *SI* estimates where available for map units in the Natural Resources Conservation Service (NRCS) soil surveys; 2) predict *SI* for map units where it was missing using soil and climate variables as predictors; and 3) modify the *SI* values for soil conditions that were not reflected in the original estimates (for example we would lower the *SI* value for poorly drained soils). Digitized county soil survey maps were downloaded for 13 counties in western Oregon: Benton, Clackamas, Coos, Curry, Douglas, Hood River, Jackson, Josephine, Lane, Linn, Polk, Yamhill, and Washington (<http://soildatamart.nrcs.usda.gov>). The study areas are in Lane and Linn counties but the larger area was used to better understand the relationships between *SI* and the predictor variables. The smallest spatial unit in the soil surveys is the map unit. The combined counties included 2511 map units. Map units contain either a single soil, a soil association containing two or more components, or a non-soil feature (e.g., water, rock outcrop). Douglas-fir *SI* estimates were given in the soil databases for 1259 map units (Figure 1). The *SI* estimates were based on field data collected as part of the soil surveys; therefore we considered them to be the most reliable estimates of *SI* that were available.

We focused on soil variables that described depth, texture, and water holding capacity. Climate data were derived from PRISM GIS layers (Daly et al. 1994) and spatially joined with the soil data. Several climate variables were evaluated including mean annual

precipitation, precipitation in the summer months (May – September), mean temperature in the summer months, and mean temperature in the winter months (January – March). Individual climate variables and combinations were evaluated for their predictive power. Data from the 1259 map units where Douglas-fir *SI* was estimated from measured tree heights and ages were used for the modeling dataset.

Different combinations of variables and model forms were tested. McCune's (2002) heat load was calculated and tested for its ability to predict *SI* using a secondary dataset derived from data collected on Forest Inventory and Analysis plots. It was not correlated with *SI* and therefore was not considered for the final model. The final model was selected based on parsimony (models with relatively few predictor variables were deemed superior), biological interpretability, and the amount of variation in *SI* that the model explained (measured by  $r^2$ ).

### Results

A modified logistic function was used to predict *SI* for the map units where it was not included in the NRCS database:

$$SI = \frac{133 - \exp(\alpha_1 \cdot JUNE DRY)}{1 + \exp(\alpha_2 + \alpha_3 \cdot \ln(2.71 + SWC))} \quad [1]$$

Where:

*JUNE DRY* = Dryness index in June, calculated as mean temperature (°C) divided by 1 + precipitation (cm) for the month of June.

*SWC* = Soil water capacity (volume of water per volume of soil).

The model form has an upper asymptote that was set to the 95<sup>th</sup> percentile of the modeling dataset (133 ft) (Figure 2). The asymptote is modified by *JUNE DRY* so that soils in drier climates have a lower maximum *SI* than those in wetter climates. *SI* is predicted in relation to the climatic maximum by *SWC*. The model explained 53 percent of the variation in *SI*.

*SI* was predicted using Equation 1 for map units where it was missing (Figure 3). Predicted *SI* values tended to be lower in the parts of the study areas where it was missing compared with those areas where it was given (Figure 1). In addition, the given values were generally lower in the study areas than in the surrounding areas, especially to the east. The values predicted by Equation 1 reinforce the pattern of low *SI* within the study areas. This is a favorable result since it shows that Equation 1 was able to extend the trend in the given data to the areas where *SI* was missing.

We modified *SI* values based on soil phase, depth to restrictions, and soil drainage class (Figure 4). NRCS soil types are divided into phases which are designed to represent differences in productivity. Phases can be based on many factors such as soil texture or presence of gravel or cobbles or frequency of flooding, but in western Oregon phases are

commonly based on slope and aspect. Despite the differences in productivity, *SI* values did not differ among phases in the NRCS database. For example, the phase Nekia silty clay loam, 2 to 12 percent slopes had the same *SI* value as Nekia silty clay loam, 30 to 50 percent slopes. We changed *SI* by up to 20 ft based on our assessment of how slope, aspect, and soil texture interact to affect site productivity. In the example above, *SI* was reduced by 10 ft for the steeper phase. Changes in *SI* were applied both to the original NRCS values and the predicted values since phase differences were not already accounted for in either set of values.

We found that Equation 1 using *SWC* and *JUNEDRY* tended to overpredict *SI* for map units that had a relatively impermeable “cemented” restriction within 1.5 m of the surface (Figure 5). The information that was used to make the modifications (e.g., whether or not a soil had a restricted layer) was taken from the NRCS databases. Therefore, we reduced *SI* by 7 ft for such map units. *SI* was reduced by 20 ft in map units that were described as soil complexes which included rock outcrops. *SI* was reduced by 5 ft for map units with somewhat poorly drained soil and 10 ft for poorly drained soil. Very poorly drained soils would be unsuitable for Douglas-fir; only one map unit was assigned to this drainage class.

Updated *SI* values were calculated for the two study areas (Figure 6). The exceptions were areas that were covered by water or structures (e.g., concrete dam). The changed for phase, drainage, depth to restrictions, and rock outcrops were applied to 34 percent, 27 percent, 3 percent, and 0.2 percent of the study areas, respectively. *SI* ranged between 100 and 120 ft for about 70 percent of the Eugene study area and 80 percent of the Lebanon study area (Figure 7). Most of the low values of *SI* (< 90 ft) were predicted and most of the high values were from the NRCS database, suggesting *SI* tended to be measured on more productive soils.

The final product from this project is a table with the following columns:

MUKEY: unique code linking spatial polygons to the tabulated information  
MUNAME: name of the soil unit  
SI\_PRED: *SI* value predicted by Equation 1  
NRCS\_SI: *SI* value from the NRCS database where available  
SI\_FINAL: final adjusted *SI* value  
PHASE\_CHANGE: the adjustment for phase differences  
REASON: the reason for making the phase change  
RESTR\_CHANGE: adjustment for soil restrictions  
ROCK\_CHANGE: adjustment for rock outcrops  
DRAIN\_CHANGE: adjustment for soil drainage class  
COMMENT: comments

## Literature Cited

- Daly, C., R. P. Neilson, and D. L. Phillips. 1994. A statistical-topographic model for mapping climatological precipitation over mountainous terrain. *Journal of Applied Meteorology* 33:140-158.
- Fuller, W. A. 1995. Estimation in the presence of measurement error. *International Statistical Review* 63:121-147.
- King, J. E. 1966. Site index curves for Douglas-fir in the Pacific Northwest. Weyerhaeuser Forestry Paper 8. Centralia, WA. 49 p.
- McCune, B., D. Keon, and R. H. Marrs. 2002. Equations for potential annual direct incident radiation and heat load. *Journal of Vegetation Science* 13:603-606.
- Rehfeldt, G. E. 2006. A spline model of climate for the Western United States. Gen. Tech. Rep. RMRS-GTR-165. Fort Collins, CO: U.S. Department of Agriculture, Forest Service, Rocky Mountain Research Station. 21 p.

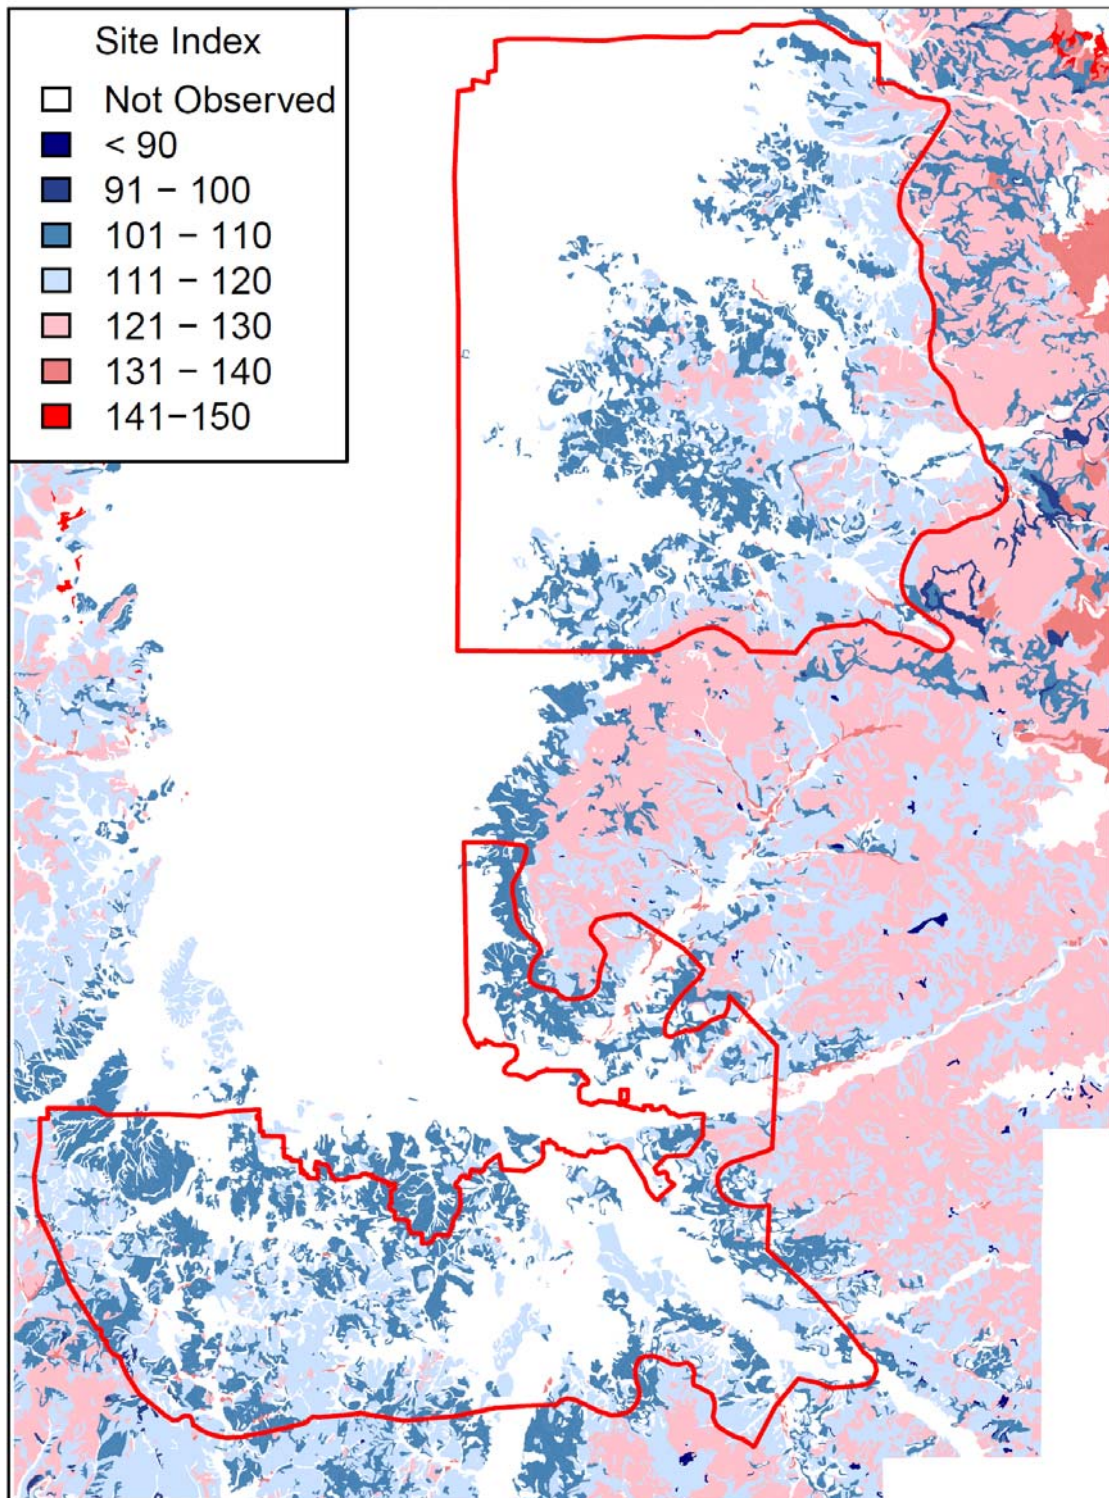

Figure 1. Douglas-fir site index values taken from the NRCS soil survey databases. The Lebanon (upper right) and Eugene (lower left) study areas are outlined in red. Site index values are associated with soil series or phases and were not necessarily measured within the study areas.

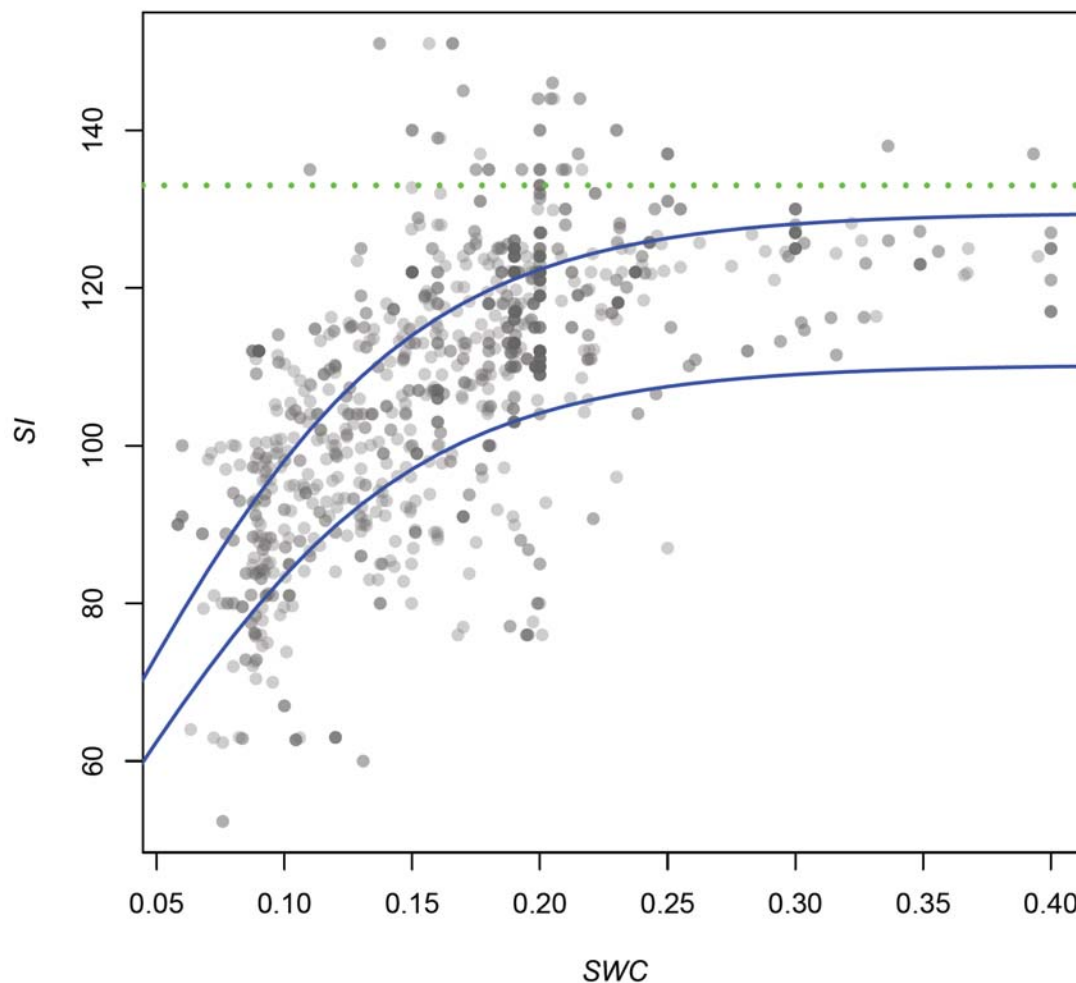

Figure 2. The fit of the model to predict site index. The points show the observed values of site index ( $SI$ ) and soil-water capacity ( $SWC$ ). The solid blue lines show predicted site index for the 5<sup>th</sup> and 95<sup>th</sup> percentiles of  $JUNEDRY$ ; thus 90 percent of the predicted  $SI$  values fall between the blue lines. The upper dotted line shows the overall maximum value that can be predicted by the model (133 ft).

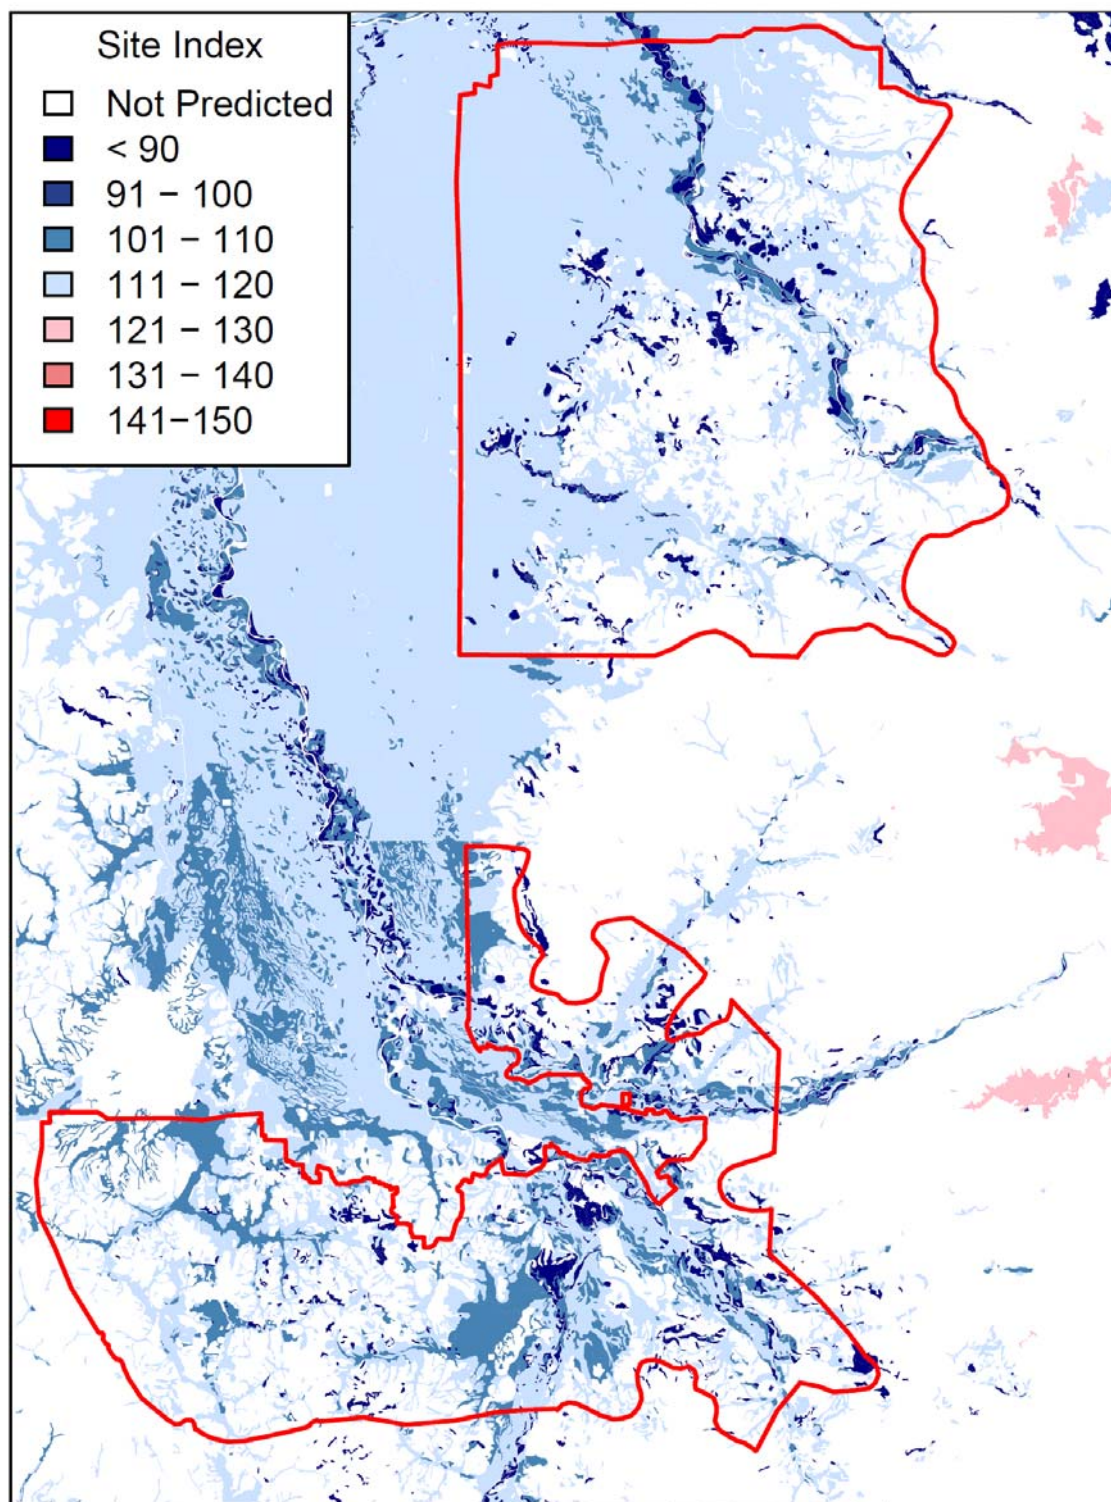

Figure 3. Douglas-fir site index values predicted by soil water-holding capacity and June temperature and precipitation.

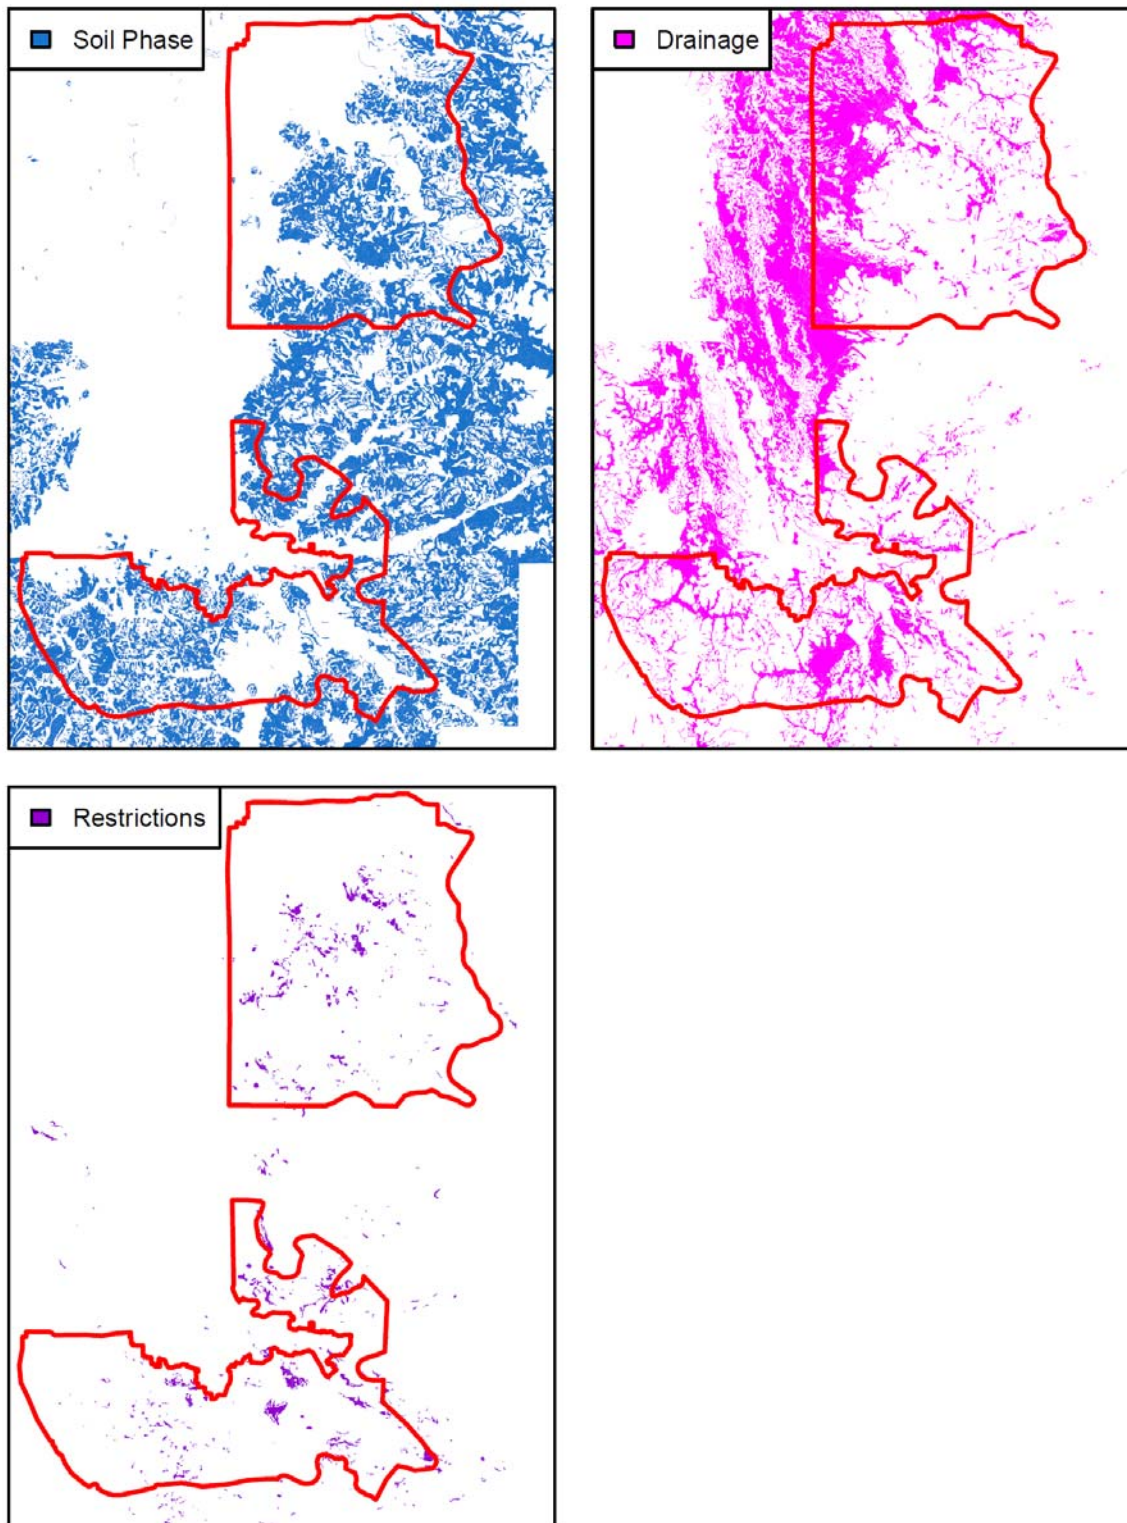

Figure 4. Areas where site index values were modified to reflect differences among soil phases (top left), concreted soil restrictions within 150 cm of the surface (bottom left), and poor soil drainage (top right).

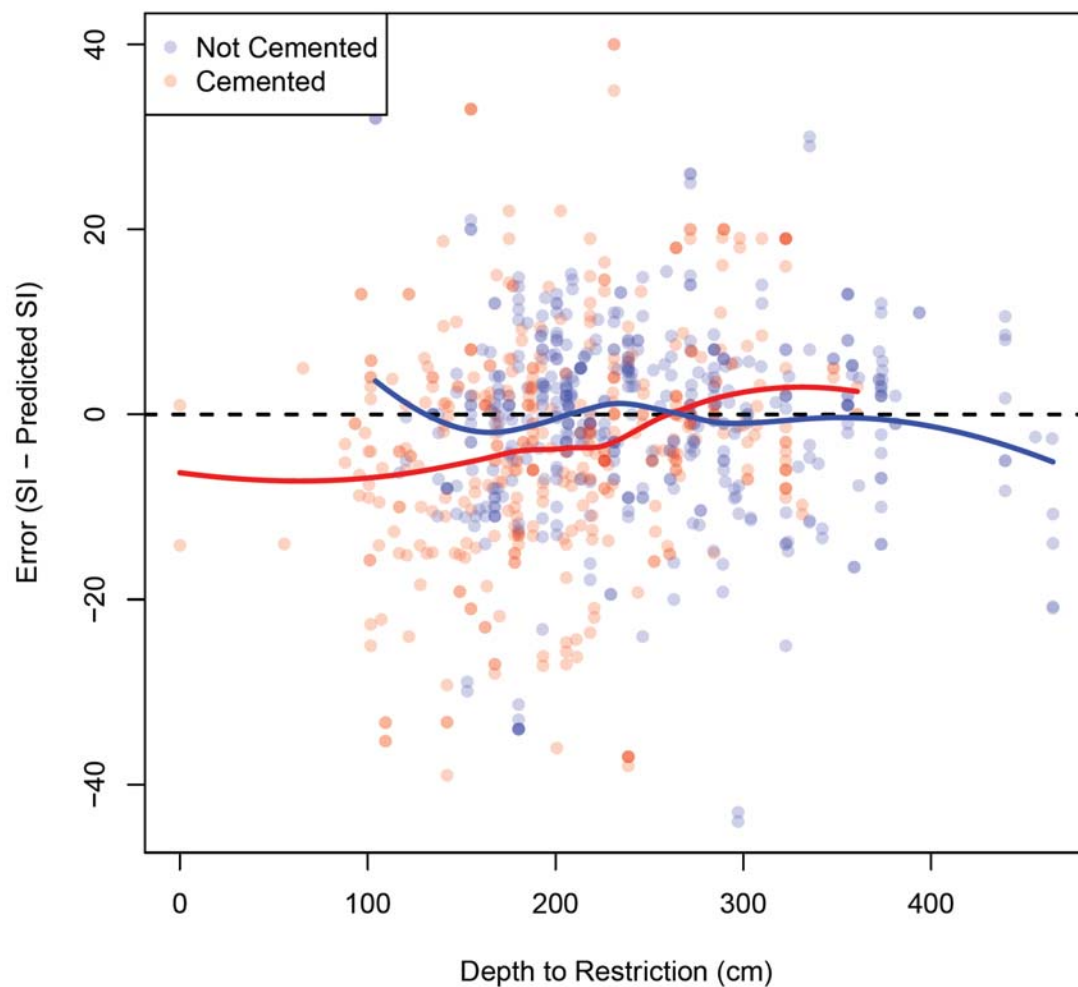

Figure 5. Error in predicted site index (*SI*) compared with depth to restriction for map units with concreted (red) and non-concreted (blue) restrictions. The solid lines are moving averages of the error values. *SI* tended to be overpredicted for map units with cemented restrictions within 1.5 m of the soil surface.

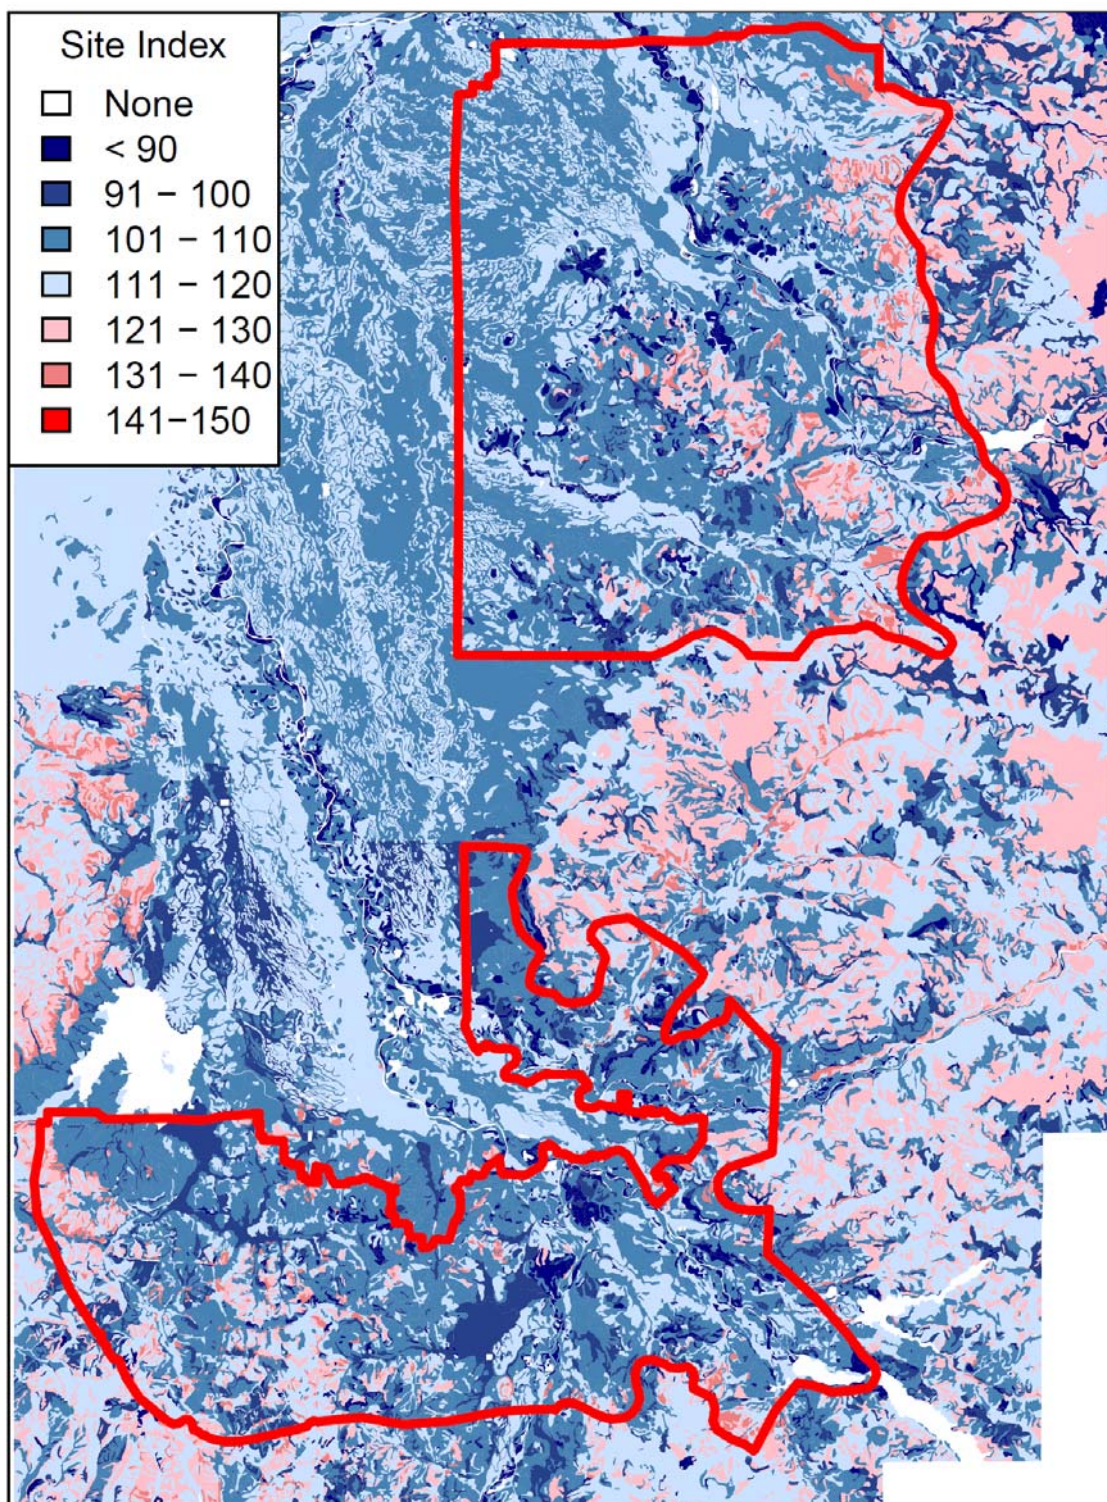

Figure 6. Final site index values for the two study areas. Site index was not estimated for water or areas covered by large structures (None value).

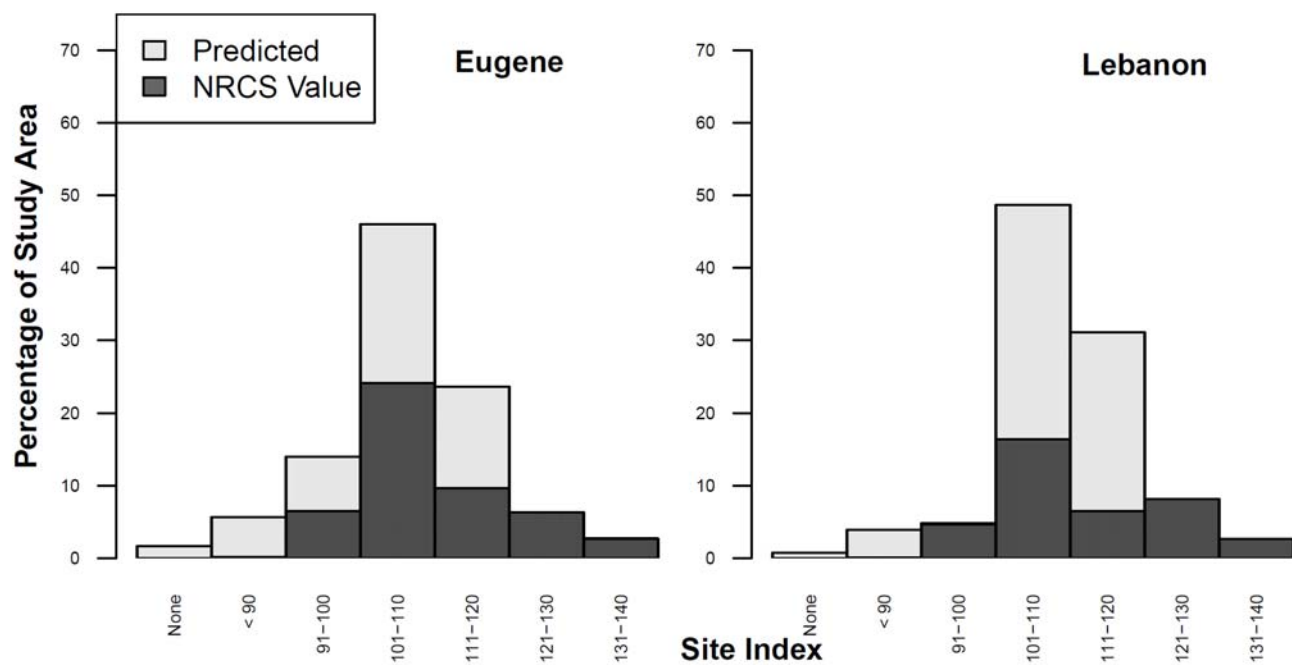

Figure 7. Percentages of the two study areas that were assigned to each range of *SI* values.

## **6. Notes on Estimation of Future Site Index for Douglas-Fir**

**Peter Gould 08/26/2009**

June temperature and precipitation are among the best predictors of site index under the current climate. This makes sense biologically since site index measures the rate of height growth and most height growth occurs in May and June. June may be a critical month because the depletion of soil moisture causes height growth to cease; the longer soil moisture is available, the greater the period of height growth.

June temperature is predicted to increase from about 16.5°C to around 20°C in the Lebanon and Eugene study areas under the A2 Scenario (Figure 1). Precipitation is not predicted to change directionally.

One approach to estimating future site index is to use relationships found under the current climate. For example, SI increases with increasing temperature given the available data (Figure 2). But how does Douglas-fir grow with June temperature > 20°C? It turns out that very little Douglas-fir grows under that climate (Figure 3). The area where June temperature is > 20°C does a good job of delineating the southern boundary of Douglas-fir's range in California.

Not only is the future climate largely outside the range of Douglas-fir, such a climate occurs almost nowhere in the western United States (Figure 4). The combination of June temperature around 20°C and precipitation > 2 cm is a novel climate and there are not any good contemporary analogs on which we can base projections of site index. Most areas with warm June temperatures are drier than the future climate. Extrapolation of relationships found under the current climate is still possible, but it must be done carefully.

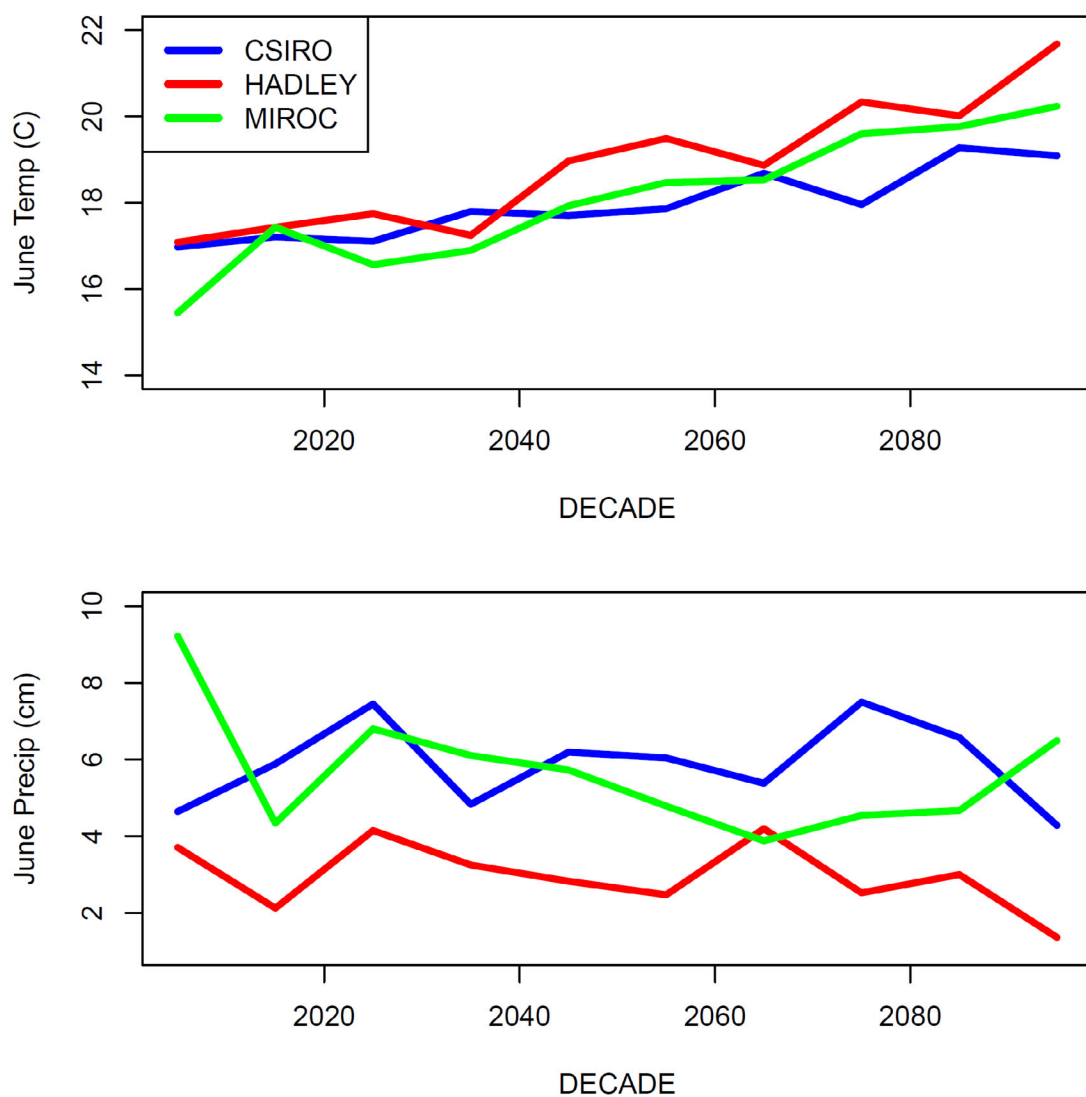

**Figure 1. Decadal mean June temperature (top) and precipitation (bottom) in the Lebanon and Eugene study areas projected by three GCMs under the A2 Scenario.**

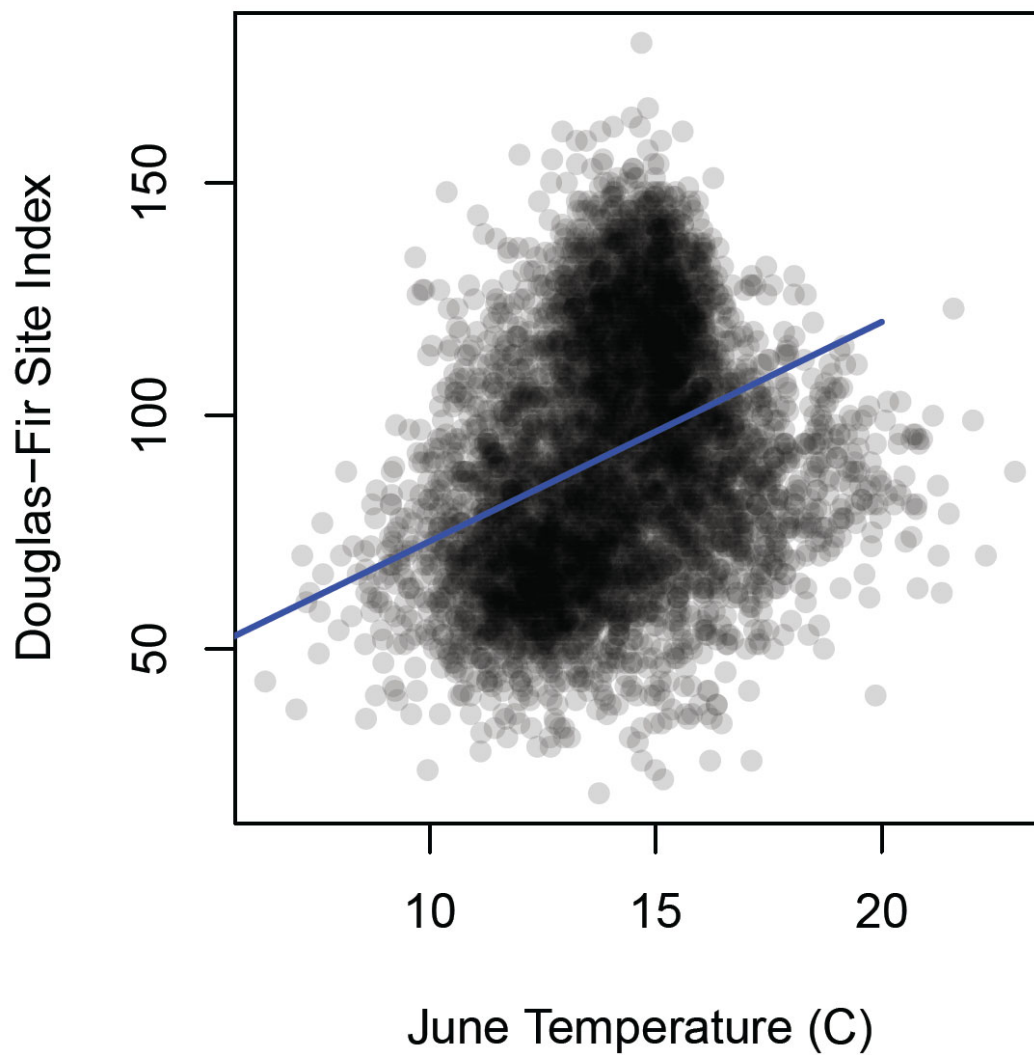

**Figure 2. Relationship between June temperature and site index under the contemporary climate.**

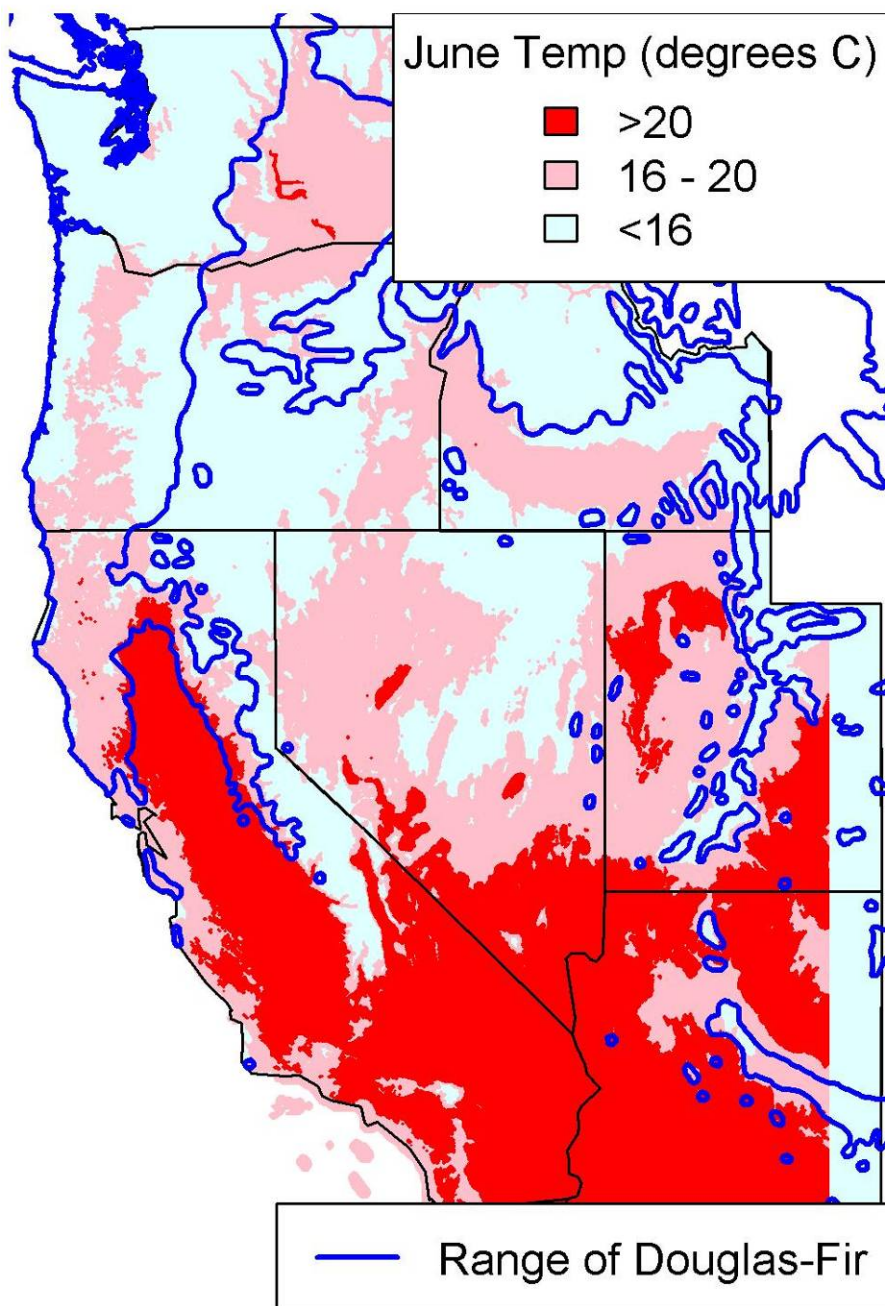

**Figure 3. Contemporary mean June temperature and the range of Douglas-fir. Temperature estimates are from PRISM.**

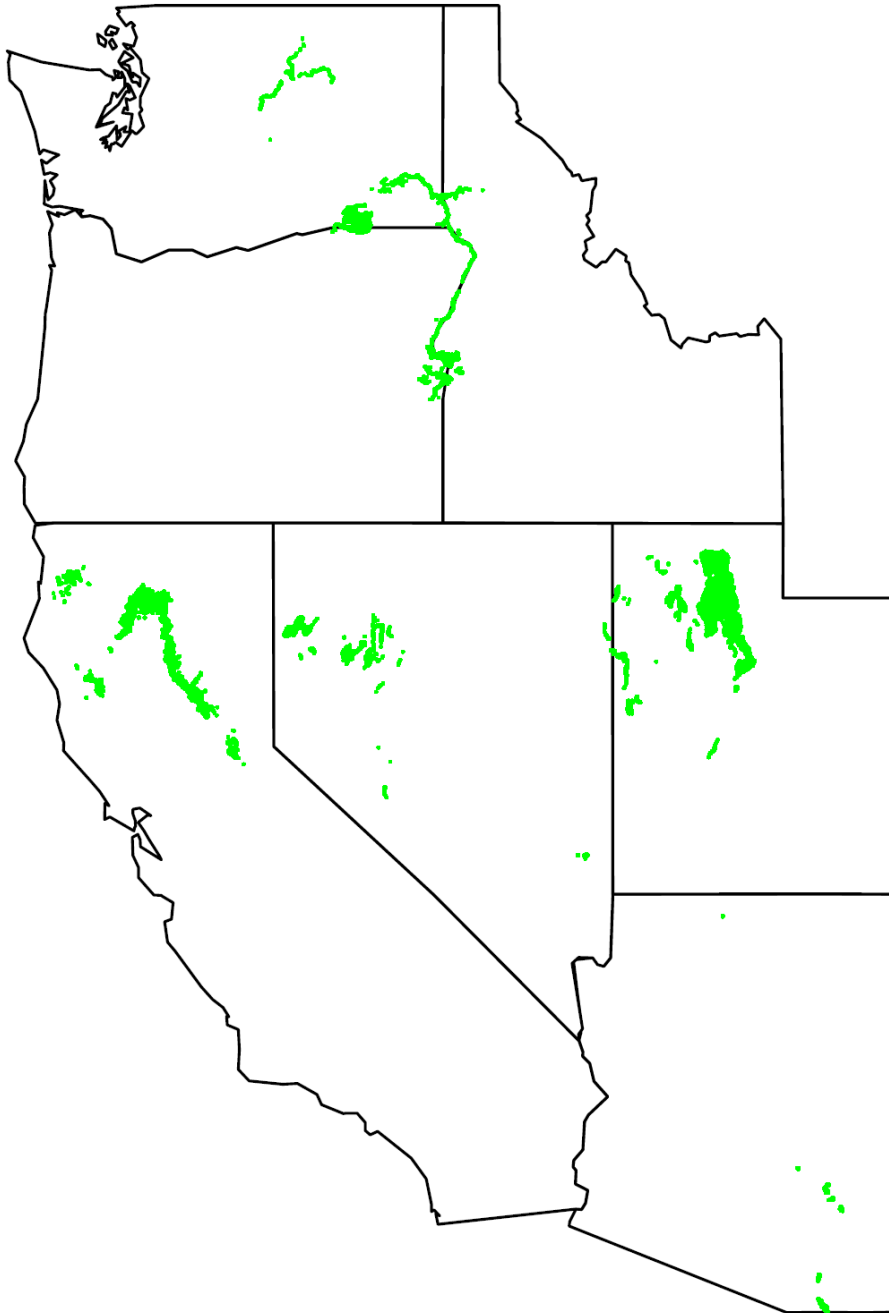

**Figure 4. Areas (green) with a current June mean temperature between 19 and 21 degrees and precipitation > 2cm.**
