# Supplementary material
Source: MDPI journal article supplement (https://www.mdpi.com/2571-6255/6/7/276)
Supplement: s1 [file s1 › Supplement S4 Supp_Figs_Tables.pdf]

## Supplement S4. Supporting Figures and Tables

The TOC and lists of figures and tables are hotlinked to their respective locations in the Supplement. For easiest navigation, also open the bookmarks. Use the TOC to locate a desired figure or table and then use the bookmarks to return to the TOC or go to any other section.

### Table of Contents

#### List of Figures

|                                                                                                                                     |   |
|-------------------------------------------------------------------------------------------------------------------------------------|---|
| Figure S4.1. Threatened residences as a function of total area burned and scenario. ....                                            | 2 |
| Figure S4.2. Relationship of cost/ha to retreatment percent for incentivized density thinning in<br>Hazard Reduction scenarios..... | 3 |

#### List of Tables

|                                                                                                                                |   |
|--------------------------------------------------------------------------------------------------------------------------------|---|
| Table S4.1. Study area cover type change from 1851 to present.....                                                             | 4 |
| Table S4.2. Cover types burned in Black Swan fire and consequences for rural residences. ....                                  | 5 |
| Table S4.3. Example of net costs (\$/ha) for initial and renewal treatments in a forest stand with<br>merchantable trees. .... | 6 |
| Table S4.4. A growing body of global WUI-related wildfire literature. ....                                                     | 7 |

(A)

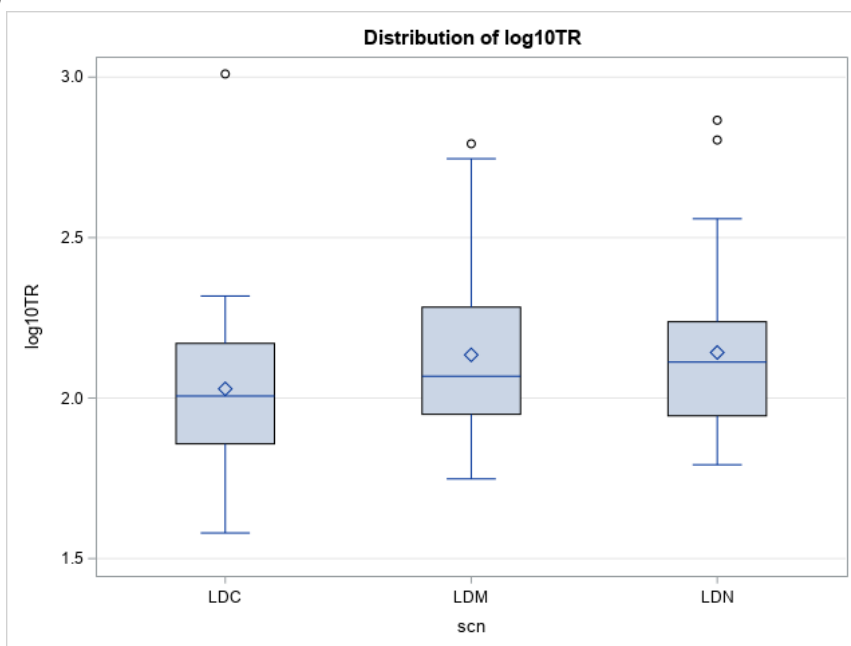

(B)

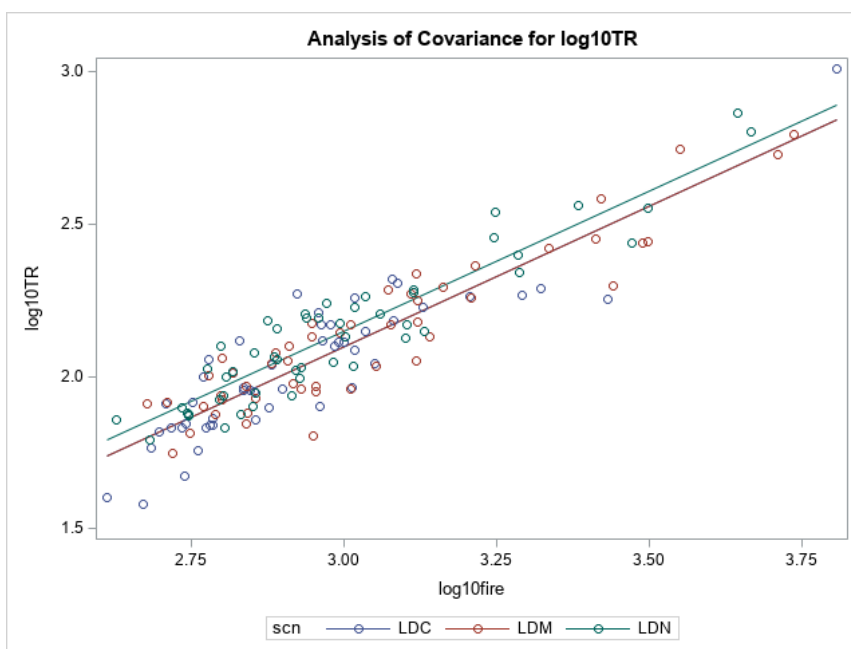

Figure S4.1. Threatened residences as a function of total area burned and scenario. (A) The number of threatened residences varied by scenario but the effect was largely overwhelmed by within-scenario variability. (B) When the total area burned was taken into account, it showed that the No management scenario increased residential risk over the other two scenarios for the same burned area. Figure 3B suggests this was due to its higher proportion of mixed- and high-severity fire (ANOVA  $F(2, 147) = 131.22$ ,  $p < 0.001$ ), which in our model overcame the protection of defensible space practices.

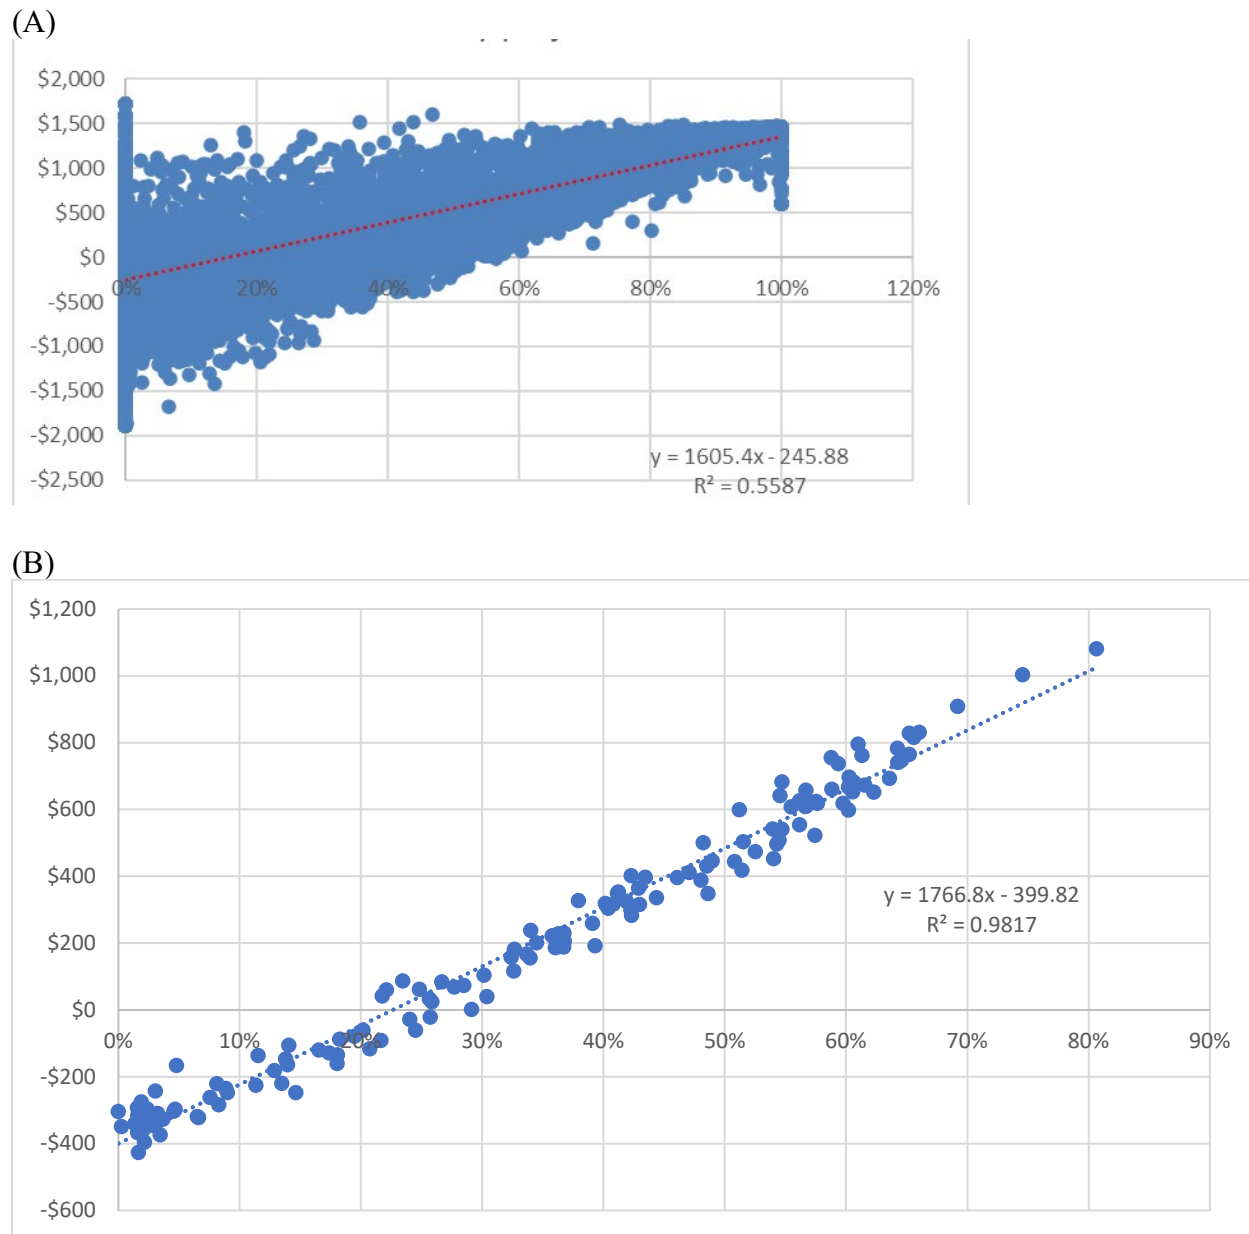

Figure S4.2. Relationship of cost/ha to retreatment percent for incentivized density thinning in Hazard Reduction scenarios. (A) by individual fuels treatments project (only) and (B) averaged across all fuels treatment projects in a given year. Results shown for the 150 years (50 years/run) of HAZ-max, HAZ-med, and HAZ-min of the Low climate impacts, Dispersed development scenarios.

Table S4.1. Study area cover type change from 1851 to present. Study area totals from 1851 derived from the PNW-ERC VEG1851\_V4 grid, re-classed to 12 categories. Present day values were derived from a synthesis of multiple existing data layers [1, 2] and classified by cover types used in this study.

| <b>Cover Type</b>                   | <b>1851</b> | <b>Present</b> |
|-------------------------------------|-------------|----------------|
| Upland and Wetland Prairie          | 32%         | 3%             |
| Oak Savanna                         | 25%         | 3%             |
| Oak Woodland                        | -           | 9%             |
| Oak/Douglas-Fir Woodland            | 14%         | 0%             |
| Oak/Douglas-fir Forest              | 1%          | 5%             |
| Douglas-Fir/Oak Forest              | -           | 14%            |
| Douglas Fir Woodland                | 3%          | -              |
| Upland Conifer Forest               | 15%         | 29%            |
| <i>Douglas-Fir Forest</i>           | -           | 11%            |
| <i>Douglas-Fir/Grand Fir Forest</i> | -           | 2%             |
| <i>Douglas-Fir/Maple</i>            | -           | 16%            |
| Mesic Hardwood Forest*              | 9%          | 4%             |
| Emergent Wetland                    | 0%          | 0%             |
| Agricultural Crop                   | -           | 8%             |
| Grass Seed and Hay                  | -           | 6%             |
| Pasture                             | -           | 14%            |
| Tree Crops                          | -           | 2%             |
| Roads                               | -           | 1%             |
| Urban                               | -           | 1%             |
| Unvegetated (incl. water)           | 1%          | 1%             |
| <b>Total</b>                        | <b>100%</b> | <b>100%</b>    |

\* 1851 “Riparian Forest”

Table S4.2. Cover types burned in Black Swan fire and consequences for rural residences. DU = Dwelling Units (in 2007 at run initiation and then in 2035, the year of the fire); DSP = Defensible Space Practices; NewDU = New Dwelling Units constructed since model year 0; TR = Threatened Residences, PR = protected residences (exposed to low-intensity fire and protected by defensible space). Run = HAZ-max, year 45. Does not include small areas within the fire perimeter with unburnable fuels.

| Cover Type               | Component of Entire Fire |            |            |               |      |      |     |     |       |      |      | By Cover Type |     |
|--------------------------|--------------------------|------------|------------|---------------|------|------|-----|-----|-------|------|------|---------------|-----|
|                          | Area<br>(ha)             | 2007<br>DU | 2035<br>DU | 2035<br>DU/ha | %DSP | %LSF | TR  | PR  | %Area | %TR  | %PR  | %TR           | %PR |
| Agriculture              | 1130                     | 137        | 338        | 0.30          | 56%  | 96%  | 161 | 177 | 20%   | 18%  | 42%  | 48%           | 52% |
| Oak -Prairie Restoration | 397                      | 26         | 89         | 0.22          | 66%  | 95%  | 32  | 57  | 7%    | 4%   | 14%  | 36%           | 64% |
| TFB Forest & Woodland    | 1014                     | 63         | 246        | 0.24          | 67%  | 55%  | 161 | 85  | 18%   | 18%  | 20%  | 65%           | 35% |
| Unmanaged Succ. Veg.     | 3181                     | 162        | 651        | 0.20          | 71%  | 27%  | 551 | 100 | 56%   | 61%  | 24%  | 85%           | 15% |
| Totals                   | 5722                     | 388        | 1324       | 0.23          | 66%  |      | 905 | 419 | 100%  | 100% | 100% |               |     |

Table S4.3. Example of net costs (\$/ha) for initial and renewal treatments in a forest stand with merchantable trees. Vegetation class is a mixed Douglas-fir and oak forest with dominant trees in the 25-50 cm diameter class. Treatment costs were based on a suite of 1-5 best management practices (BMPs) selected and priced for each treatment type as applied to each specific vegetation class. Log and chip volumes were based on the calculated board feet of timber and cubic feet of chips produced to meet treatment goals. Net log and chip income were based on estimated gross sales receipts, minus processing and transportation costs. Gross sales receipts were based on the average market conditions of 2000 and 2010, representing a recent market peak and low point. STR = structural restoration; HQ = high quality restoration.

| <b>Management Type</b>    | <b>Net Profit<br/>or Cost</b> | <b>BMP Cost</b> | <b>Net Log<br/>Income</b> | <b>Net Chip<br/>Income</b> |
|---------------------------|-------------------------------|-----------------|---------------------------|----------------------------|
| <i>Initial Treatments</i> |                               |                 |                           |                            |
| Density Thinning          | \$250                         | \$(1,000)       | \$800                     | \$450                      |
| Oak Woodland STR          | \$370                         | \$(1,680)       | \$1,450                   | \$600                      |
| Oak Woodland HQ           | \$(155)                       | \$(2,205)       | \$1,450                   | \$600                      |
| Savanna STR               | \$820                         | \$(1,680)       | \$1,800                   | \$700                      |
| Savanna HQ                | \$295                         | \$(2,205)       | \$1,800                   | \$700                      |
|                           |                               |                 |                           |                            |
| <i>Renewal treatments</i> |                               |                 |                           |                            |
| Density Thinning          | \$(600)                       | \$(600)         | --                        | --                         |
| Oak Woodland STR          | \$(300)                       | \$(300)         | --                        | --                         |
| Oak Woodland HQ           | \$(250)                       | \$(250)         | --                        | --                         |
| Savanna STR               | \$(300)                       | \$(300)         | --                        | --                         |
| Savanna HQ                | \$(250)                       | \$(250)         | --                        | --                         |

Table S4.4. A growing body of global WUI-related wildfire literature. The WUI fire phenomena is not unique to the US, as documented in reviews that span large parts of the globe, and in studies of specific countries and regions, including Australia; large areas of Europe, particularly those with Mediterranean climates such as France, Greece, Italy, and Portugal; and South America, including Argentina and Chile; with only preliminary understanding of WUI fire risk in Asia and Africa. In all these regions, particularly in Mediterranean and other summer-drought climates, climate change is expected to further exacerbate wildfire risk.

| Region                           | Citations  |
|----------------------------------|------------|
| Regions around the globe         | [3-7]      |
| Australia                        | [8-12]     |
| Large areas of Europe            | [13-15]    |
| France                           | [16, 17]   |
| Greece                           | [18, 19]   |
| Italy                            | [20]       |
| Portugal                         | [21, 22]   |
| South America                    |            |
| Argentina                        | [23, 24]   |
| Chile                            | [25-27]    |
| Asia and Africa<br>(Preliminary) | [6, 28-35] |

### Literature Cited

1. Yospin, G.I., et al., *A new model to simulate climate-change impacts on forest succession for local land management*. Ecological Applications, 2015. **25**(1): p. 226-242.
2. Johnson, B.R., et al., *Anticipatory Planning: Imagining the future to alter its course*. In Preparation.
3. Bento-Goncalves, A. and A. Vieira, *Wildfires in the wildland-urban interface: Key concepts and evaluation methodologies*. Science of the Total Environment, 2020. **707**.
4. Kramer, H.A., et al., *High wildfire damage in interface communities in California*. International Journal of Wildland Fire, 2019. **28**(9): p. 641-650.
5. McCaffrey, S., *Community Wildfire Preparedness: a Global State-of-the-Knowledge Summary of Social Science Research*. Current Forestry Reports, 2015. **1**(2): p. 81-90.
6. Chuvieco, E., et al., *Integration of ecological and socio-economic factors to assess global vulnerability to wildfire*. Global Ecology and Biogeography, 2014. **23**(2): p. 245-258.
7. Liu, Y.Q., J. Stanturf, and S. Goodrick, *Trends in global wildfire potential in a changing climate*. Forest Ecology and Management, 2010. **259**(4): p. 685-697.
8. Buxton, M., et al., *Vulnerability to Bushfire Risk at Melbourne's Urban Fringe: The Failure of Regulatory Land Use Planning*. Geographical Research, 2011. **49**(1): p. 1-12.
9. Gonzalez-Mathiesen, C., A. March, and J. Stanley, *Challenges for Wildfire-Prone Urban-Rural Interfaces: The Case of Melbourne*. Urbano, 2019. **22**(39): p. 88-105.
10. Hansen, C., *Deep Time and Disaster Black Saturday and the Forgotten Past*. Environmental Humanities, 2018. **10**(1): p. 226-240.

11. Price, O.F. and R.A. Bradstock, *The spatial domain of wildfire risk and response in the wildland urban interface in Sydney, Australia*. Natural Hazards and Earth System Sciences, 2013. **13**(12): p. 3385-3393.
12. Price, O., et al., *An empirical wildfire risk analysis: the probability of a fire spreading to the urban interface in Sydney, Australia*. International Journal of Wildland Fire, 2015. **24**(5): p. 597-606.
13. Galiana-Martin, L., *Spatial Planning Experiences for Vulnerability Reduction in the Wildland-Urban Interface in Mediterranean European Countries*. European Countryside, 2017. **9**(3): p. 577-593.
14. Tedim, F., G. Xanthopoulos, and V. Leone, *Chapter 5 - Forest Fires in Europe: Facts and Challenges*, in *Wildfire Hazards, Risks and Disasters*, J.F. Shroder and D. Paton, Editors. 2015, Elsevier: Oxford. p. 77-99.
15. Modugno, S., et al., *Mapping regional patterns of large forest fires in Wildland-Urban Interface areas in Europe*. Journal of Environmental Management, 2016. **172**: p. 112-126.
16. Kocher, S.D. and V. Butsic, *Governance of Land Use Planning to Reduce Fire Risk to Homes Mediterranean France and California*. Land, 2017. **6**(2).
17. Lampin-Maillet, C., et al., *Mapping wildland-urban interfaces at large scales integrating housing density and vegetation aggregation for fire prevention in the South of France*. Journal of Environmental Management, 2010. **91**(3): p. 732-741.
18. Diakakis, M., G. Xanthopoulos, and L. Gregos, *Analysis of forest fire fatalities in Greece: 1977-2013*. International Journal of Wildland Fire, 2016. **25**(7): p. 797-809.
19. Tsilimigkas, G., T. Kizos, and A. Gourgiotis, *Unregulated urban sprawl and spatial distribution of fire events: evidence from Greece*. Environmental Hazards-Human and Policy Dimensions, 2018. **17**(5): p. 436-455.
20. Elia, M., et al., *Modeling fire ignition patterns in Mediterranean urban interfaces*. Stochastic Environmental Research and Risk Assessment, 2019. **33**(1): p. 169-181.
21. Parente, J., et al., *Negligent and intentional fires in Portugal: Spatial distribution characterization*. Science of the Total Environment, 2018. **624**: p. 424-437.
22. Oliveira, R., et al., *Uncovering the perception regarding wildfires of residents with different characteristics*. International Journal of Disaster Risk Reduction, 2020. **43**: p. 12.
23. Arganaraz, J.P., et al., *Assessing wildfire exposure in the Wildland-Urban Interface area of the mountains of central Argentina*. Journal of Environmental Management, 2017. **196**: p. 499-510.
24. Godoy, M.M., et al., *Rapid WUI growth in a natural amenity-rich region in central-western Patagonia, Argentina*. International Journal of Wildland Fire, 2019. **28**(7): p. 473-484.
25. Soto, M.E.C., et al., *A territorial fire vulnerability model for Mediterranean ecosystems in South America*. Ecological Informatics, 2013. **13**: p. 106-113.
26. Úbeda, X. and P. Sarricolea, *Wildfires in Chile: A review*. Global and Planetary Change, 2016. **146**: p. 152-161.
27. Sarricolea, P., et al., *Recent wildfires in Central Chile: Detecting links between burned areas and population exposure in the wildland urban interface*. Science of The Total Environment, 2020. **706**: p. 135894.

28. Mutch, R.W., et al., *Protecting Lives and Property in the Wildland–Urban Interface: Communities in Montana and Southern California Adopt Australian Paradigm*. Fire Technology, 2011. **47**(2): p. 357-377.
29. Prichard, S.J., C.S. Stevens-Rumann, and P.F. Hessburg, *Tamm Review: Shifting global fire regimes: Lessons from reburns and research needs*. Forest Ecology and Management, 2017. **396**: p. 217-233.
30. van Wilgen, B.W., G.G. Forsyth, and P. Prins, *The Management of Fire-Adapted Ecosystems in an Urban Setting: the Case of Table Mountain National Park, South Africa*. Ecology and Society, 2012. **17**(1).
31. Vila-Vilardell, L., et al., *Climate change effects on wildfire hazards in the wildland-Urban-interface - Blue pine forests of Bhutan*. Forest Ecology and Management, 2020. **461**: p. 13.
32. Kraaij, T., et al., *An assessment of climate, weather, and fuel factors influencing a large, destructive wildfire in the Knysna region, South Africa*. Fire Ecology, 2018. **14**(2).
33. Le Maitre, D.C., F.J. Kruger, and G.G. Forsyth, *Interfacing ecology and policy: Developing an ecological framework and evidence base to support wildfire management in South Africa*. Austral Ecology, 2014. **39**(4): p. 424-436.
34. Wang, Z.B., X.R. Zhang, and B. Xu, *Spatio-Temporal Features of China's Urban Fires: An Investigation with Reference to Gross Domestic Product and Humidity*. Sustainability, 2015. **7**(7): p. 9734-9752.
35. Ye, J., et al., *Modeling the spatial patterns of human wildfire ignition in Yunnan province, China*. Applied Geography, 2017. **89**: p. 150-162.
